# Supplementary material
Source: PubMed Central journal article supplement (PMC7373004)
Supplement: mmc1.pdf [file mmc1.pdf]

## Supplementary materials and methods

### Contents

|                                                                                                   |          |
|---------------------------------------------------------------------------------------------------|----------|
| <b>Supplementary methods</b>                                                                      | <b>2</b> |
| Data processing . . . . .                                                                         | 2        |
| Feature selection methods . . . . .                                                               | 2        |
| Derivation of qCSI point system . . . . .                                                         | 2        |
| CSI optimization . . . . .                                                                        | 2        |
| Model performance . . . . .                                                                       | 3        |
| <b>List of Figures</b>                                                                            |          |
| S1 Bar plot of top variables from ensemble variable selection process . . . . .                   | 4        |
| S2 Frequency plot of validation cohort qCSI . . . . .                                             | 5        |
| S3 Frequency plot of validation cohort CSI . . . . .                                              | 5        |
| <b>List of Tables</b>                                                                             |          |
| S1 Upper and lower bounds for vital signs and physiologic variables . . . . .                     | 6        |
| S2 Mapping of text documentation of oxygen devices to respiratory device category . . . . .       | 7        |
| S3 List of variables used in predictive modeling . . . . .                                        | 8        |
| S4 Patient characteristics for development cohort . . . . .                                       | 16       |
| S5 Patient characteristics for validation cohort . . . . .                                        | 17       |
| S6 Physician-coded chest x-rays and outcome counts . . . . .                                      | 18       |
| S7 Performance Characteristics for CSI, qCSI, and comparison models on cross-validation . . . . . | 19       |

## Supplementary methods

### Data processing

Vital signs for the first four hours were summarized using maximum, minimum, median, mean, chronological first, and chronological last for each patient. For laboratory results, in cases where multiple results were available (e.g., lactic acid measurements), only the first was used.

Missing value imputation was required for all models with the exception of CSI gradient boosting, which handles missing data without imputation using a default sorting rule. For the Elixhauser mortality score modeling, patients without coded comorbidities were assumed not to have them. For qSOFA and CURB-65 scores, patients without a documented Glasgow Coma Score (GCS) were assumed to have GCS = 15 and the vital sign associated with the highest disease severity was used in the calculation (e.g., the lowest recorded systolic blood pressure for qSOFA). For the qCSI, patients who were documented as on ambient air were assigned an oxygen flow rate of zero. Otherwise, patients on nasal cannula with missing flow rates were assigned a flow rate by median value imputation on the given cross-validation bootstrap.

### Feature selection methods

There are varied methods for feature selection, each with associated strengths and weaknesses. We therefore took an ensemble approach trying to leverage the unique aspects of each method. For logistic regression with recursive elimination and LASSO regression techniques, we first normalized and imputed data and then used variable coefficients to compare variable importance. For the chi-square filter method variables were normalized and median imputed prior to ranking according to their chi-square value. We used Gini importance measure for random forest and both information gain and SHAP values for gradient boosted trees. Neither random forests or gradient boosting required normalization or imputation. We ranked features based on their occurrence within the top variables across the selection techniques. Vital sign and other variables summarized with maximum, minimum, mean, etc., we chose only a single summary variable (e.g., maximum heart rate) based on ranking importance and usability considerations.

### Derivation of qCSI point system

To develop the qCSI, we first binned our model variables of interest and ran logistic regression with 10-fold cross-validation across 1,000 bootstrap iterations, reviewing AU-ROC, odds ratios, and number of individuals in each variable bin to derive preliminary weights and variable intervals (Table 2). Patients on room air were assigned a flow rate of zero and missing values were imputed with medians, fit on training or validation samples separately. All odds ratio for these binnings were significant at 95% confidence level. Odds ratios were multiplied by two and rounded to the nearest integer in order to convert decimals to whole numbers. We then subtracted 2 from each odds ratio so that the reference variable would assign a score of zero. Our 10-fold cross-validation of logistic regression for 1,000 bootstrap iterations revealed an odds ratio of 1.38 (95% CI: 1.36-1.40) per point with an AU-ROC 0.90 [0.85-0.96] in predicting the composite, primary outcome.

### CSI optimization

To select an optimal set of hyperparameters, we used a tree-structured Parzen estimator (TPE) for sequential model-based global optimization based on maximization of expected improvement.<sup>1,2</sup> To define our hyperparameter search space, we used Gaussian, uniform, and log-uniform distributions across gradient boosting parameters. Our hyperparameter search space included maximum depth, learning rate, minimum child weight, max delta step, scaled weight of positive outcomes, gamma, subsampling ratios, sampling method, and L1 and L2 regularization parameters. For the objective function, the AU-ROC from the best evaluation of 10 cross-validation folds was used to calculate the loss for a particular hyperparameter set,  $\text{loss} = 1 - \text{AU-ROC}$ . After updating posterior hyperparameter distributions for 1,000 epochs, we selected the best set of hyperparameters for use in CSI. For the CSI, we used a learning rate of  $1e - 4$ ,  $\alpha = 0.8$ ,  $\lambda = 0.5$ ,  $\gamma = 33$ , a maximum delta step of 66, a max depth of 34, scaled weight for positive outcomes of 23, a minimum child weight of 79, and a random subsample of 80% of the training data per boosting iteration.

We stored the best model after 1,000 bootstrap iterations as defined by AU-ROC and Brier score loss. We then scaled the model output using isotonic regression. These transformed values were used to evaluate the model's calibration with observed risk on the external validation dataset.

### **Model performance**

We used 10-fold cross-validation with bootstrapping (1,000 iterations) to assess model performance of all five models used in this study. Elixhauser comorbidity scores, CURB-65, qSOFA, and qCSI scores were all converted to probabilities using logistic regression. The CSI yields a probability output directly and so was not processed with logistic regression.

ROC curves describe the relationship between model sensitivity and specificity as each point represents model sensitivity and specificity at a specific cutoff. The area under these curves (AU-ROC) are a common and facile metric for comparing models to one another. Area under precision recall curves (AU-PRCs) are an alternate metric that shows the relationship between precision (inversely related to the false positive rate), and recall (inversely related to false negative rate). The average precision and F1 metrics are related to the AU-PRC, representing the weighted mean of precision across varied thresholds and the the weighted means of precision and recall, respectively. Accuracy is the ratio of correctly predicted positive observations to total observations. Sensitivity is the ratio of correctly predicted positive outcomes to all positive outcomes while specificity is the ratio of all correctly predicted negative observations to all negative outcomes. Brier score is a measure of calibration - the mean squared difference between the model-assigned probability of an outcome and the actual binary outcome itself. The Brier score is the only included metric for which a low score is considered optimal.

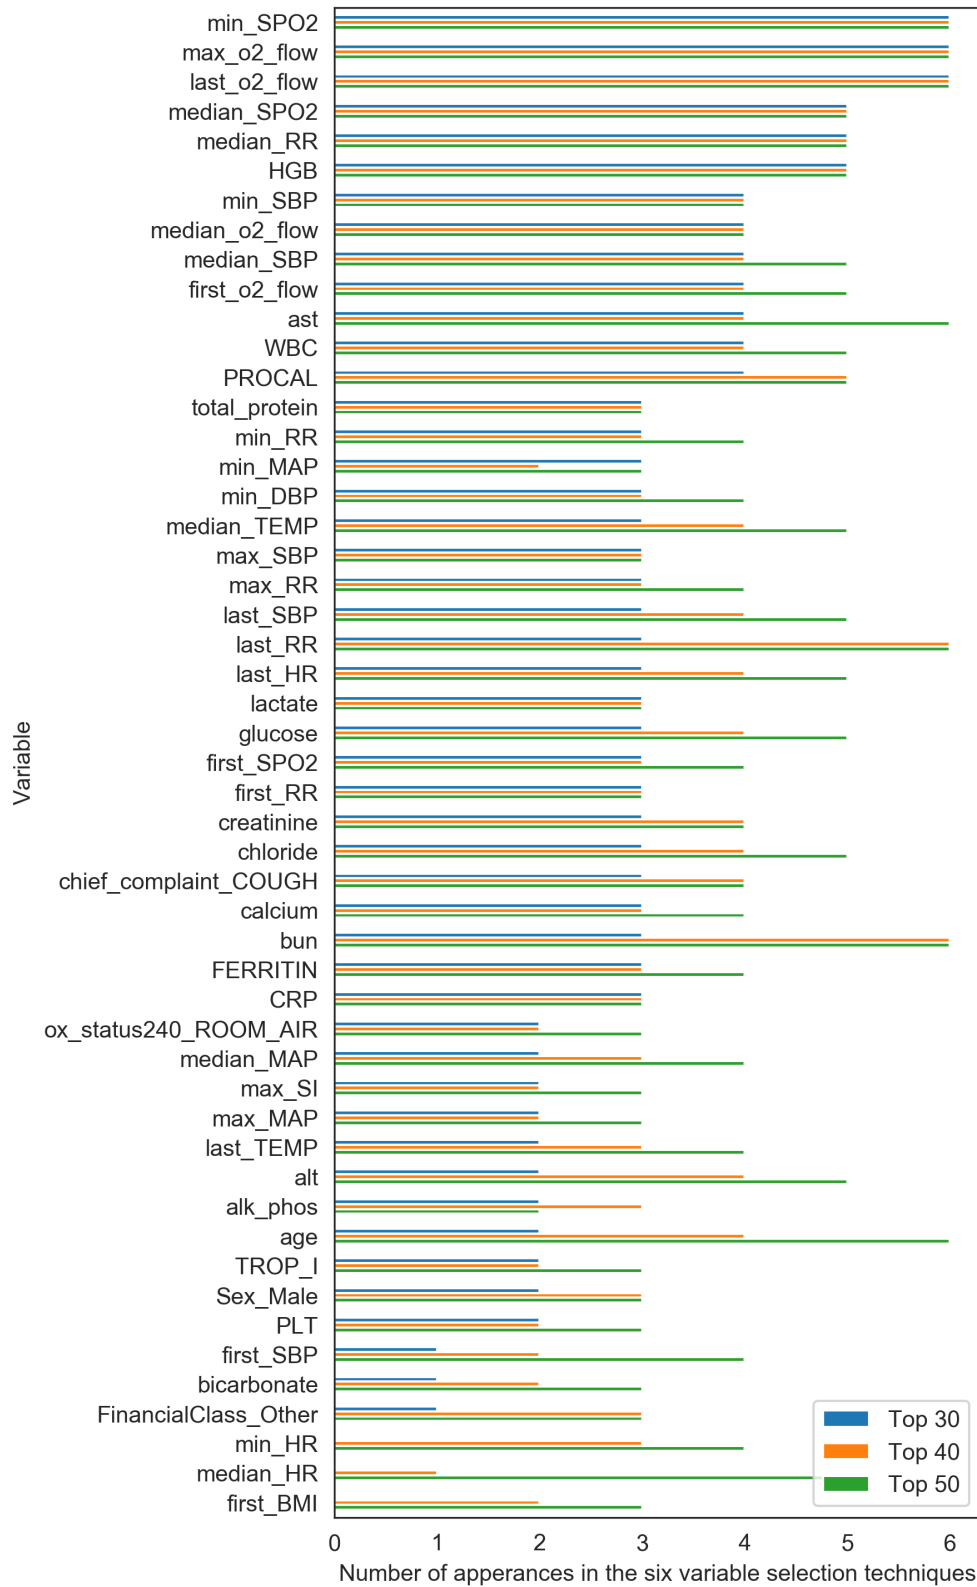

**Figure S1:** Six variable selection methods were used to identify potentially predictive variables. We limited each technique to the top 30, 40, and 50 variables of each of the methods and counted the number of models that each variable was identified by. Here, we show only those features identified by three or more models.

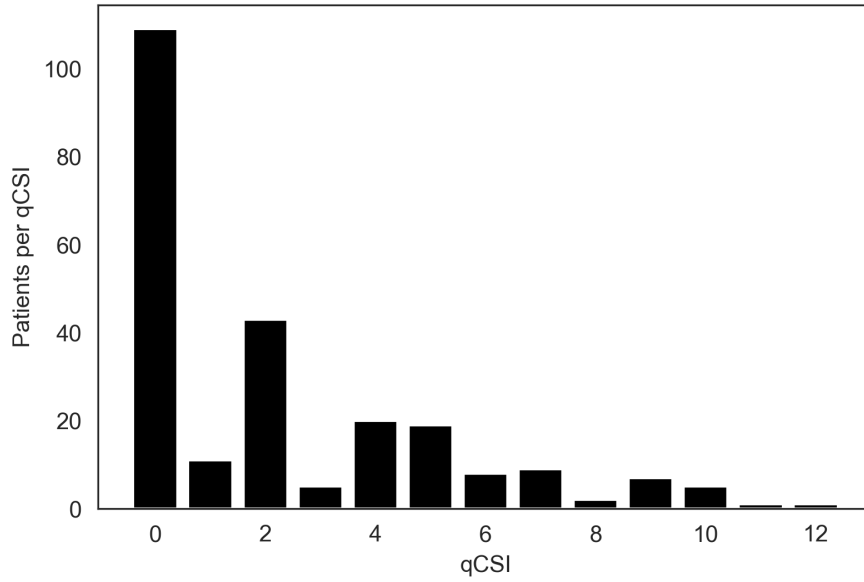

**Figure S2:** Frequency plot of validation cohort qCSI.

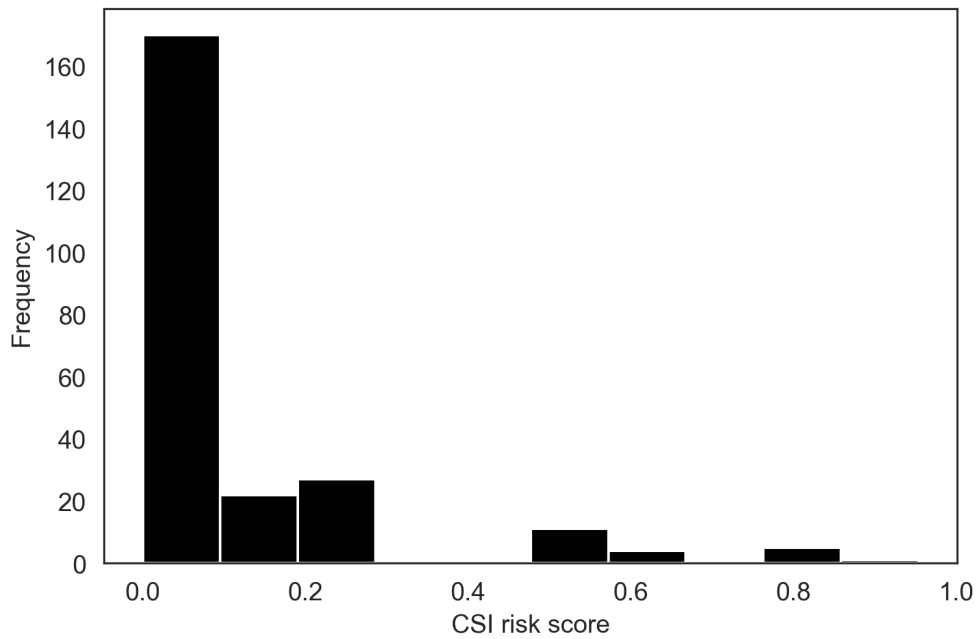

**Figure S3:** Frequency plot of validation cohort CSI. The CSI was generated by first training the gradient boosting model on the training cohort with cross-validation and isotonic regression. The best model was then retrained on the combined training and cross-validation cohorts. This model was then used to assign CSI to the external validation cohort.

**Table S1:** Upper and lower bounds for physiologic variables

| Vital                           | Lower Bound | Upper Bound |
|---------------------------------|-------------|-------------|
| Systolic blood pressure (mmHg)  | 30          | 300         |
| Diastolic blood pressure (mmHg) | 20          | 200         |
| Heart rate                      | 20          | 300         |
| Respiratory rate                | 5           | 60          |
| Pulse oximetry                  | 40          | 100         |
| Temperature (F)                 | 80          | 106         |
| Body mass index                 | 10          | 80          |

**Table S2:** Mapping of text documentation of oxygen devices to respiratory device category. Critical respiratory illness was defined with the following logic: low-flow of greater than 10 liters/minute, high flow at any rate, non-invasive, or invasive.

| Category     | Text                                           |
|--------------|------------------------------------------------|
| ROOM-AIR     | ""                                             |
| ROOM-AIR     | "no"                                           |
| ROOM-AIR     | "room air"                                     |
| HIGH-FLOW    | "tracheostomy collar"                          |
| HIGH-FLOW    | "nrb"                                          |
| HIGH-FLOW    | "nonrebreather mask"                           |
| HIGH-FLOW    | "high flow nasal cannula"                      |
| HIGH-FLOW    | "high-flow nasal cannula"                      |
| HIGH-FLOW    | "venturi mask"                                 |
| HIGH-FLOW    | "mask"                                         |
| HIGH-FLOW    | "high-flow aerosol mask"                       |
| HIGH-FLOW    | "high-flow mask"                               |
| HIGH-FLOW    | "partial rebreather mask"                      |
| HIGH-FLOW    | "high flow nasal"                              |
| LOW-FLOW     | "nasal cannula with reservoir (i.e. oximizer)" |
| LOW-FLOW     | "mask"                                         |
| LOW-FLOW     | "face tent"                                    |
| LOW-FLOW     | "oxygen hood/tent"                             |
| LOW-FLOW     | "oxygen hood"                                  |
| LOW-FLOW     | "heated"                                       |
| LOW-FLOW     | "yes"                                          |
| LOW-FLOW     | "nasal cannula"                                |
| LOW-FLOW     | "oxygen tent"                                  |
| LOW-FLOW     | "o2 ring"                                      |
| LOW-FLOW     | "nc"                                           |
| LOW-FLOW     | "open oxygen mask"                             |
| LOW-FLOW     | "other"                                        |
| LOW-FLOW     | "humidified"                                   |
| LOW-FLOW     | "oxyhood/transparent enclosure"                |
| LOW-FLOW     | "O2 ring"                                      |
| LOW-FLOW     | "simple face mask"                             |
| LOW-FLOW     | "transtracheal catheter"                       |
| LOW-FLOW     | "nasal cannula w/ reservoir (i.e. oximizer)"   |
| LOW-FLOW     | "aerosol mask"                                 |
| LOW-FLOW     | "blender system"                               |
| LOW-FLOW     | "nasal cannula with humidification"            |
| LOW-FLOW     | "enclosed incubator"                           |
| LOW-FLOW     | "other (see comments)"                         |
| LOW-FLOW     | "blow by"                                      |
| LOW-FLOW     | "nasal cannula w/ humidification"              |
| LOW-FLOW     | "low flow nasal cannula"                       |
| NON-INVASIVE | "manual resuscitator"                          |
| NON-INVASIVE | "bag-valve-mask"                               |
| NON-INVASIVE | "t- piece"                                     |
| NON-INVASIVE | "tracheostomy t-piece"                         |
| NON-INVASIVE | "cpap"                                         |
| NON-INVASIVE | "ventilator - noninvasive"                     |
| NON-INVASIVE | "bipap"                                        |
| NON-INVASIVE | "bubble cpap"                                  |
| NON-INVASIVE | "nppv/niv"                                     |
| NON-INVASIVE | "nppv"                                         |
| NON-INVASIVE | "bag valve mask"                               |
| INVASIVE     | "mechanical ventilator"                        |
| INVASIVE     | "ventilator"                                   |
| INVASIVE     | "ventilator - invasive"                        |

Feature Table

|                   |                                                      |
|-------------------|------------------------------------------------------|
| age               | PANCREATIC ENZYMES                                   |
| MultiRacial       | PARASYMPATHETIC AGENTS                               |
| CRP               | PEDIATRIC VITAMIN PREPARATIONS                       |
| DIMER             | PENICILLIN ANTIBIOTICS                               |
| FERRITIN          | PERIODONTAL COLLAGENASE INHIBITORS                   |
| HGB               | PHARMACEUTICAL ADJUVANTS, TABLET, CAPSULE COMPONENTS |
| PLT               | PHOSPHATE REPLACEMENT                                |
| PROCAL            | PHOSPHODIESTERASE-4 (PDE4) INHIBITORS                |
| TROP I            | PINEAL HORMONE AGENTS                                |
| WBC               | PITUITARY SUPPRESSIVE AGENTS                         |
| alk phos          | PLATELET AGGREGATION INHIBITORS                      |
| alt               | PLATELET REDUCING AGENTS                             |
| ast               | POSTHERPETIC NEURALGIA AGENTS                        |
| bicarbonate       | POTASSIUM REPLACEMENT                                |
| bun               | POTASSIUM SPARING DIURETICS                          |
| calcium           | POTASSIUM SPARING DIURETICS IN COMBINATION           |
| chloride          | PREGNANCY FACILITATING/MAINTAINING AGENT, HORMONAL   |
| creatinine        | PREGNANCY MAINTAINING AGENT, HORMONAL                |
| glucose           | PRENATAL VITAMIN PREPARATIONS                        |
| lactate           | PRENATAL VITAMINS WITH LOW OR NO IRON                |
| potassium         | PROGESTATIONAL AGENTS                                |
| sodium            | PROTECTIVES                                          |
| total bilirubin   | PROTEIN REPLACEMENT                                  |
| total protein     | PROTEIN STABILIZERS                                  |
| median BMI        | PROTON-PUMP INHIBITORS                               |
| median DBP        | PSEUDOBULBAR AFFECT (PBA) AGENTS, NMDA ANTAGONISTS   |
| median GCS        | PULM ANTI-HTN, SOLUBLE GUANYLATE CYCLASE STIMULATOR  |
| median HR         | PULM ANTI-HTN, SEL. C-GMP PHOSPHODIESTERASE T5 INHIB |
| median MAP        | PULMONARY ANTI-HTN, ENDOTHELIN RECEPTOR ANTAGONIST   |
| median RR         | PULMONARY ANTIHYPERTENSIVES, PROSTACYCLIN-TYPE       |
| median SBP        | PULMONARY FIBROSIS - SYSTEMIC ENZYME INHIBITORS      |
| median SI         | QUINOLONE ANTIBIOTICS                                |
| median SPO2       | RECTAL PREPARATIONS                                  |
| median TEMP       | RECTAL/LOWER BOWEL PREP, GLUCOCORT. (NON-HEMORR)     |
| min BMI           | RENIN INHIBITOR, DIRECT                              |
| min DBP           | RESPIRATORY AIDS, DEVICES, EQUIPMENT                 |
| min GCS           | RIFAMYCINS AND RELATED DERIVATIVE ANTIBIOTICS        |
| min HR            | ROSACEA AGENTS, TOPICAL                              |
| min MAP           | RUBBER SYRINGES                                      |
| min RR            | SALIVA STIMULANT AGENTS                              |
| min SBP           | SALIVA SUBSTITUTE AGENTS                             |
| min SI            | SEDATIVE-HYPNOTICS - BENZODIAZEPINES                 |
| min SPO2          | SEDATIVE-HYPNOTICS, NON-BARBITURATE                  |
| min TEMP          | SELECTIVE ESTROGEN RECEPTOR MODULATORS (SERMS)       |
| max BMI           | SELECTIVE SEROTONIN REUPTAKE INHIBITOR (SSRIS)       |
| max DBP           | SEROTONIN (5HT-4) PARTIAL AGONIST AGENTS             |
| max GCS           | SEROTONIN-2 ANTAG, REUPTAKE INH/DIETARY SUPP. COMB.  |
| max HR            | SEROTONIN-2 ANTAGONIST/REUPTAKE INHIBITORS (SARIS)   |
| max MAP           | SEROTONIN-NOREPINEPHRINE REUPTAKE-INHIB (SNRIS)      |
| max RR            | SEXUAL DYSFUNCTION DEVICES                           |
| max SBP           | SICKLE CELL ANEMIA AGENTS                            |
| max SI            | SKELETAL MUSCLE RELAXANTS                            |
| max SPO2          | SMOKING DETERRENT AGENTS (GANGLIONIC STIM, OTHERS)   |
| max TEMP          | SMOKING DETERRENT-NICOTINIC RECEPT. PARTIAL AGONIST  |
| first BMI         | SODIUM/SALINE PREPARATIONS                           |
| first DBP         | SOLVENTS                                             |
| first GCS         | SOMATOSTATIC AGENTS                                  |
| first HR          | SSRI AND 5HT1A PARTIAL AGONIST ANTIDEPRESSANTS       |
| first MAP         | SSRI, SEROTONIN RECEPTOR MODULATOR ANTIDEPRESSANTS   |
| first RR          | SSRI-ANTIPSYCH, ATYPICAL, DOPAMINE, SEROTONIN ANTAG  |
| first SBP         | STEROID ANTINEOPLASTICS                              |
| first SI          | SUPPORT HOSIERY                                      |
| first SPO2        | SYRINGES AND ACCESSORIES                             |
| first TEMP        | TETRACYCLINE ANTIBIOTICS                             |
| last BMI          | THERMOMETERS                                         |
| last DBP          | THIAZIDE AND RELATED DIURETICS                       |
| last GCS          | THICKENING AGENTS, ORAL                              |
| last HR           | THROMBIN INHIBITORS, SELECTIVE, DIRECT, REVERSIBLE   |
| last MAP          | THROMBOPOIETIN RECEPTOR AGONISTS                     |
| last RR           | THYROID FUNCTION DIAGNOSTIC AGENTS                   |
| last SBP          | THYROID HORMONES                                     |
| last SI           | TOOTH ACHE PREPARATIONS                              |
| last SPO2         | TOP. ANTI-INFLAM., PHOSPHODIESTERASE-4 (PDE4) INHIB  |
| last TEMP         | TOPICAL AGENTS, MISCELLANEOUS                        |
| n measurement BMI | TOPICAL ANTI-INFLAMMATORY STEROID-LOCAL ANESTHETIC   |
| n measurement DBP | TOPICAL ANTI-INFLAMMATORY STEROIDAL                  |
| n measurement GCS | TOPICAL ANTI-INFLAMMATORY, NSAIDS                    |
| n measurement HR  | TOPICAL ANTIBIOTICS                                  |
| n measurement MAP | TOPICAL ANTICHOLINERGIC HYPERHIDROSIS TX AGENTS      |
| n measurement RR  | TOPICAL ANTIFUNGAL/ANTI-INFLAMMATORY, STEROID AGENT  |



Feature Table

|                                                                        |                                                      |
|------------------------------------------------------------------------|------------------------------------------------------|
| n measurement SBP                                                      | TOPICAL ANTIFUNGALS                                  |
| n measurement SI                                                       | TOPICAL ANTINEOPLASTIC PREMALIGNANT LESION AGENTS    |
| n measurement SPO2                                                     | TOPICAL ANTIPARASITICS                               |
| n measurement TEMP                                                     | TOPICAL ANTIVIRALS                                   |
| median o2 flow                                                         | TOPICAL HYPERTRICHOTIC AGENTS, EYELASHES             |
| min o2 flow                                                            | TOPICAL IMMUNOSUPPRESSIVE AGENTS                     |
| max o2 flow                                                            | TOPICAL LOCAL ANESTHETICS                            |
| first o2 flow                                                          | TOPICAL PREPARATIONS,ANTIBACTERIALS                  |
| last o2 flow                                                           | TOPICAL PREPARATIONS,MISCELLANEOUS                   |
| n measurement o2 flow                                                  | TOPICAL SULFONAMIDES                                 |
| PharmaceuticalClass *Unspecified                                       | TOPICAL/MUCOUS MEMBR./SUBCUT. ENZYMES                |
| PharmaceuticalClass 1ST GEN ANTIHIST-DECON-NSAID,COX NONSPEC           | TOPICALS, HYPERTRICHOTIC AGENTS                      |
| PharmaceuticalClass 1ST GEN ANTIHISTAMINE AND DECONGESTANT COMBINATION | INFANT FORMULAS                                      |
| PharmaceuticalClass 1ST GEN ANTIHISTAMINE-DECONGESTANT-ANALGESIC COMB  | INFLUENZA VIRUS VACCINES                             |
| PharmaceuticalClass 2ND GEN ANTIHISTAMINE AND DECONGESTANT COMBINATION | INOTROPIC DRUGS                                      |
| PharmaceuticalClass 2ND GEN. ANAEROBIC ANTIPROTOZOAL-ANTIBACTERIAL     | INSULINS                                             |
| PharmaceuticalClass ABSORBABLE SULFONAMIDE ANTIBACTERIAL AGENTS        | INTEGRIN RECEPTOR ANTAGONIST, MONOCLONAL ANTIBODY    |
| PharmaceuticalClass ACE INHIBITOR-CALCIUM CHANNEL BLOCKER COMBINATION  | INTERLEUKIN-4(IL-4) RECEPTOR ALPHA ANTAGONIST, MAB   |
| PharmaceuticalClass ACE INHIBITOR-THIAZIDE OR THIAZIDE-LIKE DIURETIC   | INTERLEUKIN-5(IL-5) RECEPTOR ALPHA ANTAGONIST, MAB   |
| PharmaceuticalClass ACNE AGENTS,SYSTEMIC                               | INTERLEUKIN-6 (IL-6) RECEPTOR INHIBITORS             |
| ACNE AGENTS, TOPICAL                                                   | INTESTINAL MOTILITY STIMULANTS                       |
| ADRENERGIC VASOPRESSOR AGENTS                                          | INTRA-UTERINE DEVICES (IUDS)                         |
| ADRENERGICS, AROMATIC, NON-CATECHOLAMINE                               | IODINE CONTAINING AGENTS                             |
| AGENTS TO TREAT HYPOGLYCEMIA (HYPERGLYCEMICS)                          | IRON REPLACEMENT                                     |
| AGENTS TO TREAT MULTIPLE SCLEROSIS                                     | IRRIGANTS                                            |
| AGTS TX NEUROMUSC TRANSMISSION DIS.POT-CHAN BLKR                       | IRRITABLE BOWEL SYND. AGENT,5-HT4 PARTIAL AGONIST    |
| ALLERGENIC EXTRACTS, THERAPEUTIC                                       | IRRITANTS/COUNTER-IRRITANTS                          |
| ALPHA-2 RECEPTOR ANTAGONIST ANTIDEPRESSANTS                            | IV SOLUTIONS: DEXTROSE-SALINE                        |
| ALPHA-ADRENERGIC BLOCKING AGENTS                                       | IV SOLUTIONS: DEXTROSE-WATER                         |
| ALPHA/BETA-ADRENERGIC BLOCKING AGENTS                                  | JANUS KINASE (JAK) INHIBITORS                        |
| ALZHEIMER'S THERAPY, NMDA RECEPTOR ANTAGONISTS                         | KERATOLYTICS                                         |
| ALZHEIMER'S THX.NMDA RECEPTOR ANTAG-CHOLINES INHIB                     | LAXATIVES AND CATHARTICS                             |
| AMINOGLYCOSIDE ANTIBIOTICS                                             | LAXATIVES, LOCAL/RECTAL                              |
| AMMONIA INHIBITORS                                                     | LEUKOCYTE (WBC) STIMULANTS                           |
| AMYOTROPHIC LATERAL SCLEROSIS AGENTS                                   | LEUKOTRIENE RECEPTOR ANTAGONISTS                     |
| ANAEROBIC ANTIPROTOZOAL-ANTIBACTERIAL AGENTS                           | LHRH (GNRH) AGONIST ANALOG PITUITARY SUPPRESSANTS    |
| ANALGESIC, NON-SAL.- 1ST GENERATION ANTIHISTAMINE                      | LHRH(GNRH) ANTAGONIST,PITUITARY SUPPRESSANT AGENTS   |
| ANALGESIC, NON-SALICYLATE AND BARBITURATE COMBINAT                     | LINCOSAMIDE ANTIBIOTICS                              |
| ANALGESIC, NON-SALICYLATE-EXPECTORANT COMBINATION                      | LIPOTROPICS                                          |
| ANALGESIC, SALICYLATE, BARBITURATE, XANTHINE COMB.                     | LOCAL ANESTHETICS                                    |
| ANALGESIC, NON-SALICYLATE, BARBITURATE, XANTHINE COMB                  | LOCAL ANORECTAL NITRATE PREPARATIONS                 |
| ANALGESIC, NON-SALICYLATE-1ST GEN ANTIHIST-XANTHINE                    | LOOP DIURETICS                                       |
| ANALGESIC, NSAID-1ST GEN. ANTIHISTAMINE, SEDATIVE CMB                  | MACROLIDE ANTIBIOTICS                                |
| ANALGESIC/ANTIPYRETICS, SALICYLATES                                    | MAGNESIUM SALTS REPLACEMENT                          |
| ANALGESIC/ANTIPYRETICS, NON-SALICYLATE                                 | MAOIS -NON-SELECTIVE, IRREVERSIBLE ANTIDEPRESSANTS   |
| ANAPHYLAXIS THERAPY AGENTS                                             | MAST CELL STABILIZERS                                |
| ANDROGEN/ESTROGEN PREPS FOR FEMALE SEXUAL DYSFUNC                      | MAST CELL STABILIZERS, ORALLY INHALED                |
| ANDROGENIC AGENTS                                                      | MEDICAL SUPPLIES, MISCELLANEOUS                      |
| ANGIOTEN. RECEPTR ANTAG-CALCIUM CHANL. BLKR-THIAZIDE                   | MEDICAL SUPPLIES, MISCELLANEOUS(GROUP 2)             |
| ANGIOTENSIN RECEPT-NEPRILYSIN INHIBITOR COMB(ARNI)                     | MENOPAUSAL SYMPT SUPP-SEL. ESTROGEN RECEPT MODULATOR |
| ANGIOTENSIN RECEPTOR ANTAG.-THIAZIDE DIURETIC COMB                     | METABOLIC DEFICIENCY AGENTS                          |
| ANGIOTENSIN RECEPTOR BLOCKR-CALCIUM CHANNEL BLOCKR                     | METALLIC POISON, AGENTS TO TREAT                     |
| ANTACIDS                                                               | MINERAL REPLACEMENT, MISCELLANEOUS                   |
| ANTHELMINTICS                                                          | MINERALOCORTICOIDS                                   |
| ANTI-ALCOHOLIC PREPARATIONS                                            | MIOTICS AND OTHER INTRAOCULAR PRESSURE REDUCERS      |
| ANTI-ANXIETY - BENZODIAZEPINES                                         | MONOAMINE OXIDASE (MAO) INHIBITOR ANTIDEPRESSANTS    |
| ANTI-ANXIETY DRUGS                                                     | MONOCLONAL ANTIBODIES TO IMMUNOGLOBULIN E (IGE)      |
| ANTI-ARTHRITIC, FOLATE ANTAGONIST AGENTS                               | MONOCLONAL ANTIBODY - INTERLEUKIN-5 ANTAGONISTS      |
| ANTI-CD20 (B LYMPHOCYTE) MONOCLONAL ANTIBODY                           | MONOCLONAL ANTIBODY-HUMAN INTERLEUKIN 12/23 INHIB    |
| ANTI-INFLAMMATORY TUMOR NECROSIS FACTOR INHIBITOR                      | MU-OPIOID RECEPTOR ANTAGONISTS, PERIPHERALLY-ACTING  |
| ANTI-INFLAMMATORY, INTERLEUKIN-1 BETA BLOCKERS                         | MUCOLYTICS                                           |
| ANTI-INFLAMMATORY, PYRIMIDINE SYNTHESIS INHIBITOR                      | MULTIVITAMIN PREPARATIONS                            |
| ANTI-INFLAMMATORY, PHOSPHODIESTERASE-4(PDE4) INHIB.                    | MYDRIATICS                                           |
| ANTI-INFLAMMATORY/ANTIARTHRITICS AGENTS, MISC.                         | NARCOLEPSY AND SLEEP DISORDER THERAPY AGENTS         |
| ANTI-MYCOBACTERIUM AGENTS                                              | NASAL ANTI-INFLAMMATORY STEROIDS                     |
| ANTI-OBESITY - ANOREXIC AGENTS                                         | NASAL ANTIHISTAMINE                                  |
| ANTI-OBESITY GLUCAGON-LIKE PEPTIDE-1 RECEPTOR AGONIST                  | NASAL ANTIHISTAMINE AND ANTI-INFLAM. STEROID COMB.   |
| ANTI-OBESITY SEROTONIN 2C RECEPTOR AGONISTS                            | NASAL MAST CELL STABILIZERS                          |
| ANTI-OBESITY-OPIOID ANTAG-NOREPL, DOPAMINE RU INHIB                    | NASAL MOISTURIZER                                    |
| ANTI-ULCER PREPARATIONS                                                | NASAL WASHES                                         |
| ANTI-ULCER-H.PYLORI AGENTS                                             | NEEDLES/NEEDLELESS DEVICES                           |
| ANTIANGINAL, ANTI-ISCHEMIC AGENTS, NON-HEMODYNAMIC                     | NEUROMUSCULAR BLOCKING AGENTS                        |
| ANTIARRHYTHMICS                                                        | NIACIN PREPARATIONS                                  |
| ANTIBIOTIC, ANTIBACTERIAL, MISC.                                       | NITROFURAN DERIVATIVES ANTIBACTERIAL AGENTS          |
| ANTICHOLINERGICS, ORALLY INHALED LONG ACTING                           | NON-OPIOID ANTITUSS-1ST GEN ANTIHIST-ANALGESIC COMB  |
| ANTICHOLINERGICS, ORALLY INHALED SHORT ACTING                          | NON-OPIOID ANTITUSS-1ST GEN ANTIHISTAMINE-DECONGEST  |
| ANTICHOLINERGICS, QUATERNARY AMMONIUM                                  | NON-OPIOID ANTITUSS-1ST GEN ANTIHIST-DECON-ANALGESIC |
| ANTICHOLINERGICS/ANTISPASMODICS                                        | NON-OPIOID ANTITUSS-DECONGESTANT-ANALGESIC-EXPECT    |
| ANTICOAGULANTS, COUMARIN TYPE                                          | NON-OPIOID ANTITUSSIVE AND EXPECTORANT COMBINATION   |
| ANTICONVULSANT - BENZODIAZEPINE TYPE                                   | NON-OPIOID ANTITUSSIVE-1ST GEN ANTIHISTAMINE COMB.   |
| ANTICONVULSANT - CANNABINOID TYPE                                      | NON-OPIOID ANTITUSSIVE-DECONGESTANT-ANALGESIC COMB   |
| ANTICONVULSANTS                                                        | NOREPINEPHRINE AND DOPAMINE REUPTAKE INHIB (NDRIS)   |
| ANTIDIARRHEAL MICROORGANISMS AGENTS                                    | NOSE PREPARATIONS ANTIBIOTICS                        |
| ANTIDIARRHEALS                                                         | NOSE PREPARATIONS, MISCELLANEOUS (OTC)               |
| ANTIDIURETIC AND VASOPRESSOR HORMONES                                  | NOSE PREPARATIONS, MISCELLANEOUS (RX)                |

Feature Table

|                                                      |                                                       |
|------------------------------------------------------|-------------------------------------------------------|
| ANTIEMETIC, CANNABINOID-TYPE                         | NOSE PREPARATIONS, VASOCONSTRICTORS(OTC)              |
| ANTIEMETIC/ANTIVERTIGO AGENTS                        | NSAID AND HISTAMINE H2 RECEPTOR ANTAGONIST COMB.      |
| ANTIFIBRINOLYTIC AGENTS                              | NSAID,COX INHIBITOR-TYPE AND PROTON-PUMP INHIBITOR    |
| ANTIFIBROTIC THERAPY - PYRIDONE ANALOGS              | NSAIDS(COX NON-SPEC.INHIB)AND PROSTAGLANDIN ANALOG    |
| ANTIFLATULENTS                                       | NSAIDS, CYCLOOXYGENASE INHIBITOR - TYPE ANALGESICS    |
| ANTIFUNGAL AGENTS                                    | NSAIDS,CYCLOOXYGENASE-2(COX-2) SELECTIVE INHIBITOR    |
| ANTIFUNGAL ANTIBIOTICS                               | NUTRITIONAL THERAPY, MED COND SPECIAL FORMULATION     |
| ANTIHEMOPHILIC FACTORS                               | OINTMENT/CREAM BASES                                  |
| ANTIHISTAMINES                                       | OPHTH VASC. ENDOTHELIAL GROWTH FACTOR ANTAGONISTS     |
| ANTIHISTAMINES - 1ST GENERATION                      | OPHTHALMIC ANTI-INFLAMMATORY IMMUNOMODULATOR-TYPE     |
| ANTIHISTAMINES - 2ND GENERATION                      | OPHTHALMIC ANTIBIOTICS                                |
| ANTIHYPERGLY.INCRETIN MIMETIC(GLP-1 RECEPT.AGONIST)  | OPHTHALMIC CYSTINE DEPLETING AGENTS                   |
| ANTIHYPERGLY.INSULIN.LONG ACT-GLP-1 RECEPT.AGONIST   | OPHTHALMIC PREPARATIONS, MISCELLANEOUS                |
| ANTIHYPERGLYCEMIC-SOD/GLUC COTRANSPORT2(SGLT2)INHIB  | OPIOID ANALGESIC AND NON-SALICYLATE ANALGESICS        |
| ANTIHYPERGLYCEMIC, ALPHA-GLUCOSIDASE INHIBITORS      | OPIOID ANALGESIC AND NSAID COMBINATION                |
| ANTIHYPERGLYCEMIC, BIGUANIDE TYPE                    | OPIOID ANALGESIC AND SALICYLATE ANALGESIC COMB        |
| ANTIHYPERGLYCEMIC, DPP-4 INHIBITORS                  | OPIOID ANALGESIC, ANESTHETIC ADJUNCT AGENTS           |
| ANTIHYPERGLYCEMIC, INSULIN-RELEASE STIMULANT TYPE    | OPIOID ANALGESICS                                     |
| ANTIHYPERGLYCEMIC, SGLT-2 AND DPP-4 INHIBITOR COMB   | OPIOID AND SALICYLATE ANALGESICS,BARBIT,XANTHINE      |
| ANTIHYPERGLYCEMIC, THIAZOLIDINEDIONE AND BIGUANIDE   | OPIOID ANTAGONISTS                                    |
| ANTIHYPERGLYCEMIC, THIAZOLIDINEDIONE-SULFONYLUREA    | OPIOID ANTITUSSIVE-1ST GENERATION ANTIHISTAMINE       |
| ANTIHYPERGLYCEMIC,DPP-4 INHIBITOR-BIGUANIDE COMBS.   | OPIOID ANTITUSSIVE-ANTICHOLINERGIC COMBINATIONS       |
| ANTIHYPERGLYCEMIC,INSULIN-RELEASE STIM.-BIGUANIDE    | OPIOID ANTITUSSIVE-EXPECTORANT COMBINATION            |
| ANTIHYPERGLYCEMIC,THIAZOLIDINEDIONE(PPARG AGONIST)   | OPIOID WITHDRAWAL THERAPY AGENTS, OPIOID-TYPE         |
| ANTIHYPERGLYCEMIC-GLUCOCORTICOID RECEPTOR BLOCKER    | OPIOID,NON-SALICYL.ANALGESIC,BARBITURATE,XANTHINE     |
| ANTIHYPERGLYCEMIC-SGLT2 INHIBITOR-BIGUANIDE COMBS.   | ORAL LIPID SUPPLEMENTS                                |
| ANTIHYPERLIP.HMG COA REDUCT INHIB-CHOLEST.AB.INHIB   | ORAL MUCOSITIS/STOMATITIS AGENTS                      |
| ANTIHYPERLIPID- HMG-COA RI-CALCIUM CHANNEL BLOCKER   | OSMOTIC DIURETICS                                     |
| ANTIHYPERLIPIDEMIC - PCSK9 INHIBITORS                | OSTOMY SUPPLIES                                       |
| ANTIHYPERLIPIDEMIC-HMGCOA REDUCTASE INHIB(STATINS)   | OTIC PREPARATIONS,ANTI-INFLAMMATORY-ANTIBIOTICS       |
| ANTIHYPERTENSIVES, ACE INHIBITORS                    | OVERACTIVE BLADDER AGENTS, BETA-3 ADRENERGIC RECEPTOR |
| ANTIHYPERTENSIVES, ANGIOTENSIN RECEPTOR ANTAGONIST   | OVULATION TESTS                                       |
| ANTIHYPERTENSIVES, SYMPATHOLYTIC                     | OXAZOLIDINONE ANTIBIOTICS                             |
| ANTIHYPERTENSIVES, VASODILATORS                      | OXIDIZING AGENTS                                      |
| ANTILEPTOTICS                                        | OXYTOCICS                                             |
| ANTIMIGRAINE PREPARATIONS                            | PANCREATIC ENZYMES                                    |
| ANTINEOPLAST HUM VEGF INHIBITOR RECOMB MC ANTIBODY   | PARASYMPATHETIC AGENTS                                |
| ANTINEOPLASTIC - ALKYLATING AGENTS                   | PEDIATRIC VITAMIN PREPARATIONS                        |
| ANTINEOPLASTIC - ANTIANDROGENIC AGENTS               | PENICILLIN ANTIBIOTICS                                |
| ANTINEOPLASTIC - ANTIMETABOLITES                     | PERIODONTAL COLLAGENASE INHIBITORS                    |
| ANTINEOPLASTIC - AROMATASE INHIBITORS                | PHARMACEUTICAL ADJUVANTS, TABLET, CAPSULE COMPONENTS  |
| ANTINEOPLASTIC - BRAF KINASE INHIBITORS              | PHOSPHATE REPLACEMENT                                 |
| ANTINEOPLASTIC - HALICHONDRIIN B ANALOGS             | PHOSPHODIESTERASE-4 (PDE4) INHIBITORS                 |
| ANTINEOPLASTIC - JANUS KINASE (JAK) INHIBITORS       | PINEAL HORMONE AGENTS                                 |
| ANTINEOPLASTIC - MEK1 AND MEK2 KINASE INHIBITORS     | PITUITARY SUPPRESSIVE AGENTS                          |
| ANTINEOPLASTIC - MTOR KINASE INHIBITORS              | PLATELET AGGREGATION INHIBITORS                       |
| ANTINEOPLASTIC IMMUNOMODULATOR AGENTS                | PLATELET REDUCING AGENTS                              |
| ANTINEOPLASTIC LHRH(GNRH) AGONIST,PITUITARY SUPPR.   | POSTHERPETIC NEURALGIA AGENTS                         |
| ANTINEOPLASTIC SYSTEMIC ENZYME INHIBITORS            | POTASSIUM REPLACEMENT                                 |
| ANTINEOPLASTIC,ANTI-PROGRAMMED DEATH-1 (PD-1) MAB    | POTASSIUM SPARING DIURETICS                           |
| ANTINEOPLASTIC-B CELL LYMPHOMA-2(BCL-2) INHIBITORS   | POTASSIUM SPARING DIURETICS IN COMBINATION            |
| ANTINEOPLASTIC-SELECT INHIB OF NUCLEAR EXP (SINE)    | PREGNANCY FACILITATING/MAINTAINING AGENT,HORMONAL     |
| ANTINEOPLASTICS,MISCELLANEOUS                        | PREGNANCY MAINTAINING AGENT,HORMONAL                  |
| ANTINFLAMMATORY, SEL.COSTIM.MOD.,T-CELL INHIBITOR    | PRENATAL VITAMIN PREPARATIONS                         |
| ANTIOXIDANT AGENTS                                   | PRENATAL VITAMINS WITH LOW OR NO IRON                 |
| ANTIOXIDANT MULTIVITAMIN COMBINATIONS                | PROGESTATIONAL AGENTS                                 |
| ANTIPARKINSONISM DRUGS,ANTICHOLINERGIC               | PROTECTIVES                                           |
| ANTIPARKINSONISM DRUGS,OTHER                         | PROTEIN REPLACEMENT                                   |
| ANTIPERSPIRANTS                                      | PROTEIN STABILIZERS                                   |
| ANTIPROTOZOAL DRUGS,MISCELLANEOUS                    | PROTON-PUMP INHIBITORS                                |
| ANTIPTURITICS, TOPICAL                               | PSEUDOBULBAR AFFECT (PBA) AGENTS, NMDA ANTAGONISTS    |
| ANTIPSORIATIC AGENTS,SYSTEMIC                        | PULM ANTI-HTN,SOLUBLE GUANYLATE CYCLASE STIMULATOR    |
| ANTIPSORIATICS AGENTS                                | PULM.ANTI-HTN,SEL.C-GMP PHOSPHODIESTERASE T5 INHIB    |
| ANTIPSYCHOTIC,ATYPICAL,DOPAMINE,SEROTONIN ANTAGONIST | PULMONARY ANTI-HTN, ENDOTHELIN RECEPTOR ANTAGONIST    |
| ANTIPSYCHOTIC-ATYPICAL,D3/D2 PARTIAL AG-5HT MIXED    | PULMONARY ANTIHYPERTENSIVES, PROSTACYCLIN-TYPE        |
| ANTIPSYCHOTICS, ATYP. D2 PARTIAL AGONIST/5HT MIXED   | PULMONARY FIBROSIS - SYSTEMIC ENZYME INHIBITORS       |
| ANTIPSYCHOTICS, DOPAMINE AND SEROTONIN ANTAGONISTS   | QUINOLONE ANTIBIOTICS                                 |
| ANTIPSYCHOTICS,DOPAMINE ANTAGONISTS, THIOXANTHENES   | RECTAL PREPARATIONS                                   |
| ANTIPSYCHOTICS,DOPAMINE ANTAGONISTS,BUTYROPHENONES   | RECTAL/LOWER BOWEL PREP.GLUCOCORT. (NON-HEMORR)       |
| ANTIPSYCHOTICS,PHENOTHIAZINES                        | RENIN INHIBITOR, DIRECT                               |
| ANTIRETROVIRAL-INTEGRASE INHIBITOR AND NNRTI COMB.   | RESPIRATORY AIDS,DEVICES,EQUIPMENT                    |
| ANTIRETROVIRAL-INTEGRASE INHIBITOR AND NRTI COMB.    | RIFAMYCINS AND RELATED DERIVATIVE ANTIBIOTICS         |
| ANTIRETROVIRAL-NRTIS AND INTEGRASE INHIBITORS COMB   | ROSACEA AGENTS, TOPICAL                               |
| ANTIRETROVIRAL-NUCLEOSIDE,NUCLEOTIDE,PROTEASE INH.   | RUBBER SYRINGES                                       |
| ANTISEBORRHEIC AGENTS                                | SALIVA STIMULANT AGENTS                               |
| ANTISEPTICS,GENERAL                                  | SALIVA SUBSTITUTE AGENTS                              |
| ANTISERA                                             | SEDATIVE-HYPNOTICS - BENZODIAZEPINES                  |
| ANTITHYROID PREPARATIONS                             | SEDATIVE-HYPNOTICS, NON-BARBITURATE                   |
| ANTITUBERCULAR ANTIBIOTICS                           | SELECTIVE ESTROGEN RECEPTOR MODULATORS (SERMS)        |
| ANTITUSSIVE-1ST GEN ANTI-T-A ANALGESIC-EXPECT COMB   | SELECTIVE SEROTONIN REUPTAKE INHIBITOR (SSRIS)        |
| ANTITUSSIVES, NON-OPIOID                             | SEROTONIN (5HT-4) PARTIAL AGONIST AGENTS              |
| ANTIVIRALS, GENERAL                                  | SEROTONIN-2 ANTAG.REUPTAKE INH/DIETARY SUPP. COMB.    |
| ANTIVIRALS, HIV-SPEC, NON-PEPTIDIC PROTEASE INHIB    | SEROTONIN-2 ANTAGONIST/REUPTAKE INHIBITORS (SARIS)    |
| ANTIVIRALS, HIV-SPEC, NUCLEOSIDE-NUCLEOTIDE ANALOG   | SEROTONIN-NOREPINEPHRINE REUPTAKE-INHIB (SNRIS)       |
| ANTIVIRALS, HIV-SPEC., NUCLEOSIDE ANALOG, RTI COMB   | SEXUAL DYSFUNCTION DEVICES                            |

Feature Table

|                                                    |                                                     |
|----------------------------------------------------|-----------------------------------------------------|
| ANTIVIRALS, HIV-SPECIFIC, NON-NUCLEOSIDE, RTI      | SICKLE CELL ANEMIA AGENTS                           |
| ANTIVIRALS, HIV-SPECIFIC, NUCLEOSIDE ANALOG, RTI   | SKELETAL MUSCLE RELAXANTS                           |
| ANTIVIRALS, HIV-SPECIFIC, NUCLEOTIDE ANALOG, RTI   | SMOKING DETERRENT AGENTS (GANGLIONIC STIM.OTHERS)   |
| ANTIVIRALS, HIV-SPECIFIC, PROTEASE INHIBITOR COMB  | SMOKING DETERRENT-NICOTINIC RECEPT.PARTIAL AGONIST  |
| ANTIVIRALS, HIV-SPECIFIC, PROTEASE INHIBITORS      | SODIUM/SALINE PREPARATIONS                          |
| ANTIVIRALS,HIV-1 INTEGRASE STRAND TRANSFER INHIBTR | SOLVENTS                                            |
| APPETITE STIM. FOR ANOREXIA,CACHEXIA,WASTING SYND. | SOMATOSTATIC AGENTS                                 |
| ARGININE VASOPRESSIN (AVP) RECEPTOR ANTAGONISTS    | SSRI AND 5HT1A PARTIAL AGONIST ANTIDEPRESSANTS      |
| ARTIFICIAL TEARS                                   | SSRI, SEROTONIN RECEPTOR MODULATOR ANTIDEPRESSANTS  |
| ARTV NUCLEOSIDE,NUCLEOTIDE,NON-NUCLEOSIDE RTI COMB | SSRI-ANTIPSYCH, ATYPICAL,DOPAMINE,SEROTONIN ANTAG   |
| ARV-NUCLEOSIDE,NUCLEOTIDE RTI,INTEGRASE INHIBITORS | STEROID ANTINEOPLASTICS                             |
| ASTRINGENTS                                        | SUPPORT HOSIERY                                     |
| BANDAGES AND RELATED SUPPLIES                      | SYRINGES AND ACCESSORIES                            |
| BARBITURATES                                       | TETRACYCLINE ANTIBIOTICS                            |
| BELLADONNA ALKALOIDS                               | THERMOMETERS                                        |
| BENIGN PROSTATIC HYPERTROPHY/MICTURITION AGENTS    | THIAZIDE AND RELATED DIURETICS                      |
| BETA-ADRENERGIC AGENTS                             | THICKENING AGENTS, ORAL                             |
| BETA-ADRENERGIC AGENTS, INHALED, SHORT ACTING      | THROMBIN INHIBITORS, SELECTIVE, DIRECT, REVERSIBLE  |
| BETA-ADRENERGIC AGENTS, ORALLY INHALED,LONG ACTING | THROMBOPOIETIN RECEPTOR AGONISTS                    |
| BETA-ADRENERGIC AND ANTICHOLINERGIC COMBO, INHALED | THYROID FUNCTION DIAGNOSTIC AGENTS                  |
| BETA-ADRENERGIC AND GLUCOCORTICOID COMBO, INHALED  | THYROID HORMONES                                    |
| BETA-ADRENERGIC BLOCKING AGENTS                    | TOOTH ACHE PREPARATIONS                             |
| BETA-ADRENERGIC-ANTICHOLINERGIC-GLUCOCORT, INHALED | TOP. ANTI-INFLAM.,PHOSPHODIESTERASE-4 (PDE4) INHIB  |
| BETA-BLOCKERS AND THIAZIDE,THIAZIDE-LIKE DIURETICS | TOPICAL AGENTS,MISCELLANEOUS                        |
| BICARBONATE PRODUCING/CONTAINING AGENTS            | TOPICAL ANTI-INFLAMMATORY STEROID-LOCAL ANESTHETIC  |
| BILE SALT SEQUESTRANTS                             | TOPICAL ANTI-INFLAMMATORY STEROIDAL                 |
| BILE SALTS                                         | TOPICAL ANTI-INFLAMMATORY, NSAIDS                   |
| BIOFLAVONOIDS                                      | TOPICAL ANTIBIOTICS                                 |
| BIPOLAR DISORDER DRUGS                             | TOPICAL ANTICHOLINERGIC HYPERHIDROSIS TX AGENTS     |
| BLOOD SUGAR DIAGNOSTICS                            | TOPICAL ANTIFUNGAL/ANTI-INFLAMMATORY,STEROID AGENT  |
| BONE FORMATION STIM. AGENTS - PARATHYROID HORMONE  | TOPICAL ANTIFUNGALS                                 |
| BONE FORMATION STIMULATING AGTS - PTH REL PEPTIDES | TOPICAL ANTINEOPLASTIC PREMALIGNANT LESION AGENTS   |
| BONE RESORPTION INHIBITORS                         | TOPICAL ANTIPARASITICS                              |
| BPH 5-ALPHA-REDUCTASE INHIB-ALPHA1-ADRENOCEP ANTAG | TOPICAL ANTIVIRALS                                  |
| BRACES AND RELATED DEVICES                         | TOPICAL HYPERTRICHOTIC AGENTS, EYELASHES            |
| BULK CHEMICALS                                     | TOPICAL IMMUNOSUPPRESSIVE AGENTS                    |
| C1 ESTERASE INHIBITORS                             | TOPICAL LOCAL ANESTHETICS                           |
| CALCIMIMETIC,PARATHYROID CALCIUM ENHANCER          | TOPICAL PREPARATIONS,ANTIBACTERIALS                 |
| CALCIUM CHANNEL BLOCKING AGENTS                    | TOPICAL PREPARATIONS,MISCELLANEOUS                  |
| CALCIUM REPLACEMENT                                | TOPICAL SULFONAMIDES                                |
| CARBAPENEM ANTIBIOTICS (THIENAMYCINS)              | TOPICAL/MUCOUS MEMBR./SUBCUT. ENZYMES               |
| CARBOHYDRATES                                      | TOPICALS, HYPERTRICHOTIC AGENTS                     |
| CARBONIC ANHYDRASE INHIBITORS                      | INFANT FORMULAS                                     |
| CATHETERS AND RELATED DEVICES                      | INFLUENZA VIRUS VACCINES                            |
| CEPHALOSPORIN ANTIBIOTICS - 1ST GENERATION         | INOTROPIC DRUGS                                     |
| CEPHALOSPORIN ANTIBIOTICS - 2ND GENERATION         | INSULINS                                            |
| CEPHALOSPORIN ANTIBIOTICS - 3RD GENERATION         | INTEGRIN RECEPTOR ANTAGONIST, MONOCLONAL ANTIBODY   |
| CEPHALOSPORIN ANTIBIOTICS - 4TH GENERATION         | INTERLEUKIN-4(IL-4) RECEPTOR ALPHA ANTAGONIST, MAB  |
| CHEMOTHERAPY RESCUE/ANTIDOTE AGENTS                | INTERLEUKIN-5(IL-5) RECEPTOR ALPHA ANTAGONIST, MAB  |
| CHOLINESTERASE INHIBITORS                          | INTERLEUKIN-6 (IL-6) RECEPTOR INHIBITORS            |
| CHRONIC INFLAM. COLON DX, 5-A-SALICYLAT,RECTAL TX  | INTESTINAL MOTILITY STIMULANTS                      |
| COLCHICINE                                         | INTRA-UTERINE DEVICES (IUDS)                        |
| COLORING AGENTS AND DYES                           | IODINE CONTAINING AGENTS                            |
| CONTACT LENS PREPARATIONS(GAS,HARD,SOFT)           | IRON REPLACEMENT                                    |
| CONTRACEPTIVES, INTRAVAGINAL, SYSTEMIC             | IRRIGANTS                                           |
| CONTRACEPTIVES,IMPLANTABLE                         | IRRITABLE BOWEL SYND. AGENT,5-HT4 PARTIAL AGONIST   |
| CONTRACEPTIVES,INJECTABLE                          | IRRITANTS/COUNTER-IRRITANTS                         |
| CONTRACEPTIVES,ORAL                                | IV SOLUTIONS: DEXTROSE-SALINE                       |
| CONTRACEPTIVES,TRANSDERMAL                         | IV SOLUTIONS: DEXTROSE-WATER                        |
| COUGH AND/OR COLD PREPARATIONS                     | JANUS KINASE (JAK) INHIBITORS                       |
| CYCLIC LIPOPEPTIDES                                | KERATOLYTICS                                        |
| CYSTIC FIBROSIS-CFTR POTENTIATOR-CORRECTOR COMBIN. | LAXATIVES AND CATHARTICS                            |
| DECARBOXYLASE INHIBITORS                           | LAXATIVES, LOCAL/RECTAL                             |
| DECONGEST-ANALGESIC,NON-SALICYLATE COMB.           | LEUKOCYTE (WBC) STIMULANTS                          |
| DECONGESTANT-ANALGESIC-EXPECTORANT COMBINATION     | LEUKOTRIENE RECEPTOR ANTAGONISTS                    |
| DECONGESTANT-EXPECTORANT COMBINATIONS              | LHRH (GNRH) AGONIST ANALOG PITUITARY SUPPRESSANTS   |
| DECONGESTANT-NSAID, COX NON-SPEC COMB.             | LHRH(GNRH) ANTAGONIST,PITUITARY SUPPRESSANT AGENTS  |
| DECONGESTANTS, ORAL                                | LINCOSAMIDE ANTIBIOTICS                             |
| DENTAL AIDS AND PREPARATIONS                       | LIPOTROPICS                                         |
| DIABETIC SUPPLIES                                  | LOCAL ANESTHETICS                                   |
| DIAGNOSTIC PREPARATIONS,MISCELLANEOUS              | LOCAL ANORECTAL NITRATE PREPARATIONS                |
| DIALYSIS SOLUTIONS                                 | LOOP DIURETICS                                      |
| DIETARY SUPPLEMENT, MISCELLANEOUS                  | MACROLIDE ANTIBIOTICS                               |
| DIGITALIS GLYCOSIDES                               | MAGNESIUM SALTS REPLACEMENT                         |
| DIRECT FACTOR XA INHIBITORS                        | MAOIS -NON-SELECTIVE,IRREVERSIBLE ANTIDEPRESSANTS   |
| DRUG TX-CHRONIC INFLAM. COLON DX,5-AMINOSALICYLAT  | MAST CELL STABILIZERS                               |
| DRUGS TO TREAT ERECTILE DYSFUNCTION (ED)           | MAST CELL STABILIZERS, ORALLY INHALED               |
| DRUGS TO TREAT MOVEMENT DISORDERS                  | MEDICAL SUPPLIES,MISCELLANEOUS                      |
| DURABLE MEDICAL EQUIPMENT,MISC(GROUP 1)            | MEDICAL SUPPLIES,MISCELLANEOUS(GROUP 2)             |
| DURABLE MEDICAL EQUIPMENT,MISC(GROUP 2)            | MENOPAUSAL SYMPT SUPP-SEL ESTROGEN RECEPT MODULATOR |
| DURABLE MEDICAL EQUIPMENT,MISCELLANEOUS            | METABOLIC DEFICIENCY AGENTS                         |
| EAR PREPARATIONS ANTI-INFLAMMATORY                 | METALLIC POISON,AGENTS TO TREAT                     |
| EAR PREPARATIONS, MISCELLANEOUS (OTC)              | MINERAL REPLACEMENT, MISCELLANEOUS                  |
| EAR PREPARATIONS,ANTIBIOTICS                       | MINERALOCORTICIODS                                  |
| EAR PREPARATIONS,EAR WAX REMOVERS                  | MIOTICS AND OTHER INTRAOCULAR PRESSURE REDUCERS     |

Feature Table

|                                                    |                                                     |
|----------------------------------------------------|-----------------------------------------------------|
| ELECTROLYTE DEPLETERS                              | MONOAMINE OXIDASE (MAO) INHIBITOR ANTIDEPRESSANTS   |
| ELECTROLYTE MAINTENANCE                            | MONOCLONAL ANTIBODIES TO IMMUNOGLOBULIN E (IGE)     |
| EMOLLIENTS                                         | MONOCLONAL ANTIBODY - INTERLEUKIN-5 ANTAGONISTS     |
| ERYTHROPOIESIS-STIMULATING AGENTS                  | MONOCLONAL ANTIBODY-HUMAN INTERLEUKIN 12/23 INHIB   |
| ESTROGEN AND PROGESTIN COMBINATIONS                | MU-OPIOID RECEPTOR ANTAGONISTS,PERIPHERALLY-ACTING  |
| ESTROGEN/ANDROGEN COMBINATIONS                     | MUCOLYTICS                                          |
| ESTROGENIC AGENTS                                  | MULTIVITAMIN PREPARATIONS                           |
| EXPECTORANTS                                       | MYDRIATICS                                          |
| EYE ANTI-INFLAMMATORY AGENTS                       | NARCOLEPSY AND SLEEP DISORDER THERAPY AGENTS        |
| EYE ANTIBIOTIC AND GLUCOCORTICOID COMBINATIONS     | NASAL ANTI-INFLAMMATORY STEROIDS                    |
| EYE ANTIHISTAMINE-VASOCONSTRICTOR COMBINATIONS     | NASAL ANTIHISTAMINE                                 |
| EYE ANTIHISTAMINES                                 | NASAL ANTIHISTAMINE AND ANTI-INFLAM. STEROID COMB.  |
| EYE ANTIVIRALS                                     | NASAL MAST CELL STABILIZERS                         |
| EYE LOCAL ANESTHETICS                              | NASAL MOISTURIZER                                   |
| EYE MAST CELL STABILIZERS                          | NASAL WASHES                                        |
| EYE PREPARATIONS, MISCELLANEOUS (OTC)              | NEEDLES/NEEDLELESS DEVICES                          |
| EYE SULFONAMIDES                                   | NEUROMUSCULAR BLOCKING AGENTS                       |
| EYE VASOCONSTRICTORS (OTC ONLY)                    | NIACIN PREPARATIONS                                 |
| FAT ABSORPTION DECREASING AGENTS                   | NITROFURAN DERIVATIVES ANTIBACTERIAL AGENTS         |
| FEEDING DEVICES                                    | NON-OPIOID ANTITUS-1ST GEN ANTIHIST-ANALGESIC COMB  |
| FERTILITY STIMULATING PREPARATIONS,NON-FSH         | NON-OPIOID ANTITUS-1ST GEN.ANTIHISTAMINE-DECONGEST  |
| FIBROMYALGIA AGENTS,SEROTONIN-NOREPINEPH RU INHIB  | NON-OPIOID ANTITUS-1STGEN ANTIHIST-DECON-ANALGESIC  |
| FLUORIDE PREPARATIONS                              | NON-OPIOID ANTITUSS-DECONGESTANT-ANALGESIC-EXPECT   |
| FOLIC ACID PREPARATIONS                            | NON-OPIOID ANTITUSSIVE AND EXPECTORANT COMBINATION  |
| FOLLICLE-STIMULATING HORMONE (FSH)                 | NON-OPIOID ANTITUSSIVE-1ST GEN ANTIHISTAMINE COMB.  |
| GASTRIC ENZYMES                                    | NON-OPIOID ANTITUSSIVE-DECONGESTANT-ANALGESIC COMB  |
| GENERAL ANESTHETICS,INJECTABLE                     | NOREPINEPHRINE AND DOPAMINE REUPTAKE INHIB (NDRIS)  |
| GENERAL ANESTHETICS,INJECTABLE-BENZODIAZEPINE TYPE | NOSE PREPARATIONS ANTIBIOTICS                       |
| GENERAL BRONCHODILATOR AGENTS                      | NOSE PREPARATIONS, MISCELLANEOUS (OTC)              |
| GENERAL INHALATION AGENTS                          | NOSE PREPARATIONS, MISCELLANEOUS (RX)               |
| GERIATRIC VITAMIN PREPARATIONS                     | NOSE PREPARATIONS, VASOCONSTRICTORS(OTC)            |
| GLOVES                                             | NSAID AND HISTAMINE H2 RECEPTOR ANTAGONIST COMB.    |
| GLUCOCORTICIODS                                    | NSAID,COX INHIBITOR-TYPE AND PROTON-PUMP INHIBITOR  |
| GLUCOCORTICIODS, ORALLY INHALED                    | NSAIDS(COX NON-SPEC.INHIB)AND PROSTAGLANDIN ANALOG  |
| GLYCYLCLYCLINES                                    | NSAIDS, CYCLOOXYGENASE INHIBITOR - TYPE ANALGESICS  |
| GRAM (-) BACILLI (NON-ENTERIC) VACCINES            | NSAIDS,CYCLOOXYGENASE-2(COX-2) SELECTIVE INHIBITOR  |
| GRAM NEGATIVE COCCI VACCINES                       | NUTRITIONAL THERAPY, MED COND SPECIAL FORMULATION   |
| GRAM POSITIVE COCCI VACCINES                       | OINTMENT/CREAM BASES                                |
| GROWTH HORMONES                                    | OPHTH VASC. ENDOTHELIAL GROWTH FACTOR ANTAGONISTS   |
| HAIR GROWTH REDUCTION AGENTS                       | OPHTHALMIC ANTI-INFLAMMATORY IMMUNOMODULATOR-TYPE   |
| HEARING AIDS AND RELATED DEVICES                   | OPHTHALMIC ANTIBIOTICS                              |
| HEART RATE REDUCING, SELECTIVE I(F) CURRENT INHIB. | OPHTHALMIC CYSTINE DEPLETING AGENTS                 |
| HEMORRHOLOGIC AGENTS                               | OPHTHALMIC PREPARATIONS, MISCELLANEOUS              |
| HEMORRHOID PREP,ANTI-INFLAM STEROID-LOCAL ANESTHET | OPIOID ANALGESIC AND NON-SALICYLATE ANALGESICS      |
| HEMORRHOIDAL PREPARATIONS                          | OPIOID ANALGESIC AND NSAID COMBINATION              |
| HEMORRHOIDALS, LOCAL RECTAL ANESTHETICS            | OPIOID ANALGESIC AND SALICYLATE ANALGESIC COMB      |
| HEP C VIRUS-NS5B POLYMERASE AND NS5A INHIB. COMBO. | OPIOID ANALGESIC, ANESTHETIC ADJUNCT AGENTS         |
| HEPARIN AND RELATED PREPARATIONS                   | OPIOID ANALGESICS                                   |
| HEPATITIS B TREATMENT AGENTS                       | OPIOID AND SALICYLATE ANALGESICS,BARBIT,XANTHINE    |
| HEPATITIS C VIRUS- NS5A AND NS3/4A INHIBITOR COMB  | OPIOID ANTAGONISTS                                  |
| HERBAL DRUGS                                       | OPIOID ANTITUSSIVE-1ST GENERATION ANTIHISTAMINE     |
| HISTAMINE H2-RECEPTOR INHIBITORS                   | OPIOID ANTITUSSIVE-ANTICHOLINERGIC COMBINATIONS     |
| HOT WATER BOTTLE AND RELATED DEVICES               | OPIOID ANTITUSSIVE-EXPECTORANT COMBINATION          |
| HYDROPHILIC CREAM/OINTMENT BASES                   | OPIOID WITHDRAWAL THERAPY AGENTS, OPIOID-TYPE       |
| HYPERTHYROID TX AGENTS - VITAMIN D ANALOG-TYPE     | OPIOID,NON-SALICYL.ANALGESIC,BARBITURATE,XANTHINE   |
| HYPERTRICHOTIC AGENTS, SYSTEMIC/INCL. COMBINATIONS | ORAL LIPID SUPPLEMENTS                              |
| HYPURICEMIA TX - XANTHINE OXIDASE INHIBITORS       | ORAL MUCOSITIS/STOMATITIS AGENTS                    |
| HYPNOTICS, MELATONIN MT1/MT2 RECEPTOR AGONISTS     | OSMOTIC DIURETICS                                   |
| HYPOPIGMENTATION AGENTS                            | OSTOMY SUPPLIES                                     |
| IBS AGENTS,MIXED OPIOID RECEP AGONISTS/ANTAGONISTS | OTIC PREPARATIONS,ANTI-INFLAMMATORY-ANTIBIOTICS     |
| IBS-C/IC AGENTS, GUANYLATE CYCLASE-C AGONIST       | OVERACTIVE BLADDER AGENTS, BETA-3 ADRENERGIC RECEPT |
| IMMUNOMODULATOR,B-LYMPHOCYTE STIM(BLYS)-SPEC INHIB | OVULATION TESTS                                     |
| IMMUNOMODULATORS                                   | OXAZOLIDINONE ANTIBIOTICS                           |
| IMMUNOSUPPRESSIVES                                 | OXIDIZING AGENTS                                    |
| INCONTINENCE SUPPLIES                              | OXYTOCICS                                           |
| INFANT FORMULAS                                    | PANCREATIC ENZYMES                                  |
| INFLUENZA VIRUS VACCINES                           | PARASYMPATHETIC AGENTS                              |
| INOTROPIC DRUGS                                    | PEDIATRIC VITAMIN PREPARATIONS                      |
| INSULINS                                           | PENICILLIN ANTIBIOTICS                              |
| INTEGRIN RECEPTOR ANTAGONIST, MONOCLONAL ANTIBODY  | PERIODONTAL COLLAGENASE INHIBITORS                  |
| INTERLEUKIN-4(IL-4) RECEPTOR ALPHA ANTAGONIST, MAB | PHARMACEUTICAL ADJUVANTS, TABLET,CAPSULE COMPONENTS |
| INTERLEUKIN-5(IL-5) RECEPTOR ALPHA ANTAGONIST, MAB | PHOSPHATE REPLACEMENT                               |
| INTERLEUKIN-6 (IL-6) RECEPTOR INHIBITORS           | PHOSPHODIESTERASE-4 (PDE4) INHIBITORS               |
| INTESTINAL MOTILITY STIMULANTS                     | PINEAL HORMONE AGENTS                               |
| INTRA-UTERINE DEVICES (IUDS)                       | PITUITARY SUPPRESSIVE AGENTS                        |
| IODINE CONTAINING AGENTS                           | PLATELET AGGREGATION INHIBITORS                     |
| IRON REPLACEMENT                                   | PLATELET REDUCING AGENTS                            |
| IRRIGANTS                                          | POSTHERPETIC NEURALGIA AGENTS                       |
| IRRITABLE BOWEL SYND. AGENT,5-HT4 PARTIAL AGONIST  | POTASSIUM REPLACEMENT                               |
| IRRITANTS/COUNTER-IRRITANTS                        | POTASSIUM SPARING DIURETICS                         |
| IV SOLUTIONS: DEXTROSE-SALINE                      | POTASSIUM SPARING DIURETICS IN COMBINATION          |
| IV SOLUTIONS: DEXTROSE-WATER                       | PREGNANCY FACILITATING/MAINTAINING AGENT,HORMONAL   |
| JANUS KINASE (JAK) INHIBITORS                      | PREGNANCY MAINTAINING AGENT,HORMONAL                |
| KERATOLYTICS                                       | PRENATAL VITAMIN PREPARATIONS                       |
| LAXATIVES AND CATHARTICS                           | PRENATAL VITAMINS WITH LOW OR NO IRON               |

Feature Table

|                                                       |                                                    |
|-------------------------------------------------------|----------------------------------------------------|
| LAXATIVES, LOCAL/RECTAL                               | PROGESTATIONAL AGENTS                              |
| LEUKOCYTE (WBC) STIMULANTS                            | PROTECTIVES                                        |
| LEUKOTRIENE RECEPTOR ANTAGONISTS                      | PROTEIN REPLACEMENT                                |
| LHRH (GNRH) AGONIST ANALOG PITUITARY SUPPRESSANTS     | PROTEIN STABILIZERS                                |
| LHRH(GNRH) ANTAGONIST,PITUITARY SUPPRESSANT AGENTS    | PROTON-PUMP INHIBITORS                             |
| LINCOSAMIDE ANTIBIOTICS                               | PSEUDOBLBAR AFFECT (PBA) AGENTS, NMDA ANTAGONISTS  |
| LIPOTROPICS                                           | PULM ANTI-HTN,SOLUBLE GUANYLATE CYCLASE STIMULATOR |
| LOCAL ANESTHETICS                                     | PULM.ANTI-HTN,SEL.C-GMP PHOSPHODIESTERASE T5 INHIB |
| LOCAL ANORECTAL NITRATE PREPARATIONS                  | PULMONARY ANTI-HTN, ENDOTHELIN RECEPTOR ANTAGONIST |
| LOOP DIURETICS                                        | PULMONARY ANTIHYPERTENSIVES, PROSTACYCLIN-TYPE     |
| MACROLIDE ANTIBIOTICS                                 | PULMONARY FIBROSIS - SYSTEMIC ENZYME INHIBITORS    |
| MAGNESIUM SALTS REPLACEMENT                           | QUINOLONE ANTIBIOTICS                              |
| MAOIS -NON-SELECTIVE,IRREVERSIBLE ANTIDEPRESSANTS     | RECTAL PREPARATIONS                                |
| MAST CELL STABILIZERS                                 | RECTAL/LOWER BOWEL PREP.,GLUCOCORT. (NON-HEMORR)   |
| MAST CELL STABILIZERS, ORALLY INHALED                 | RENIN INHIBITOR, DIRECT                            |
| MEDICAL SUPPLIES,MISCELLANEOUS                        | RESPIRATORY AIDS,DEVICES,EQUIPMENT                 |
| MEDICAL SUPPLIES,MISCELLANEOUS(GROUP 2)               | RIFAMYCINS AND RELATED DERIVATIVE ANTIBIOTICS      |
| MENOPAUSAL SYMPT SUPP-SEL ESTROGEN RECEPTOR MODULATOR | ROSACEA AGENTS, TOPICAL                            |
| METABOLIC DEFICIENCY AGENTS                           | RUBBER SYRINGES                                    |
| METALLIC POISON,AGENTS TO TREAT                       | SALIVA STIMULANT AGENTS                            |
| MINERAL REPLACEMENT, MISCELLANEOUS                    | SALIVA SUBSTITUTE AGENTS                           |
| MINERALOCORTICIDS                                     | SEDATIVE-HYPNOTICS - BENZODIAZEPINES               |
| MIOTICS AND OTHER INTRAOCULAR PRESSURE REDUCERS       | SEDATIVE-HYPNOTICS,NON-BARBITURATE                 |
| MONOAMINE OXIDASE (MAO) INHIBITOR ANTIDEPRESSANTS     | SELECTIVE ESTROGEN RECEPTOR MODULATORS (SERMS)     |
| MONOCLONAL ANTIBODIES TO IMMUNOGLOBULIN E (IGE)       | SELECTIVE SEROTONIN REUPTAKE INHIBITOR (SSRIS)     |
| MONOCLONAL ANTIBODY - INTERLEUKIN-5 ANTAGONISTS       | SEROTONIN (5HT-4) PARTIAL AGONIST AGENTS           |
| MONOCLONAL ANTIBODY-HUMAN INTERLEUKIN 12/23 INHIB     | SEROTONIN-2 ANTAG,REUPTAKE INH/DIETARY SUPP. COMB. |
| MU-OPIOID RECEPTOR ANTAGONISTS,PERIPHERALLY-ACTING    | SEROTONIN-2 ANTAGONIST/REUPTAKE INHIBITORS (SARIS) |
| MUCOLYTICS                                            | SEROTONIN-NOREPINEPHRINE REUPTAKE-INHIB (SNRIS)    |
| MULTIVITAMIN PREPARATIONS                             | SEXUAL DYSFUNCTION DEVICES                         |
| MYDRIATICS                                            | SICKLE CELL ANEMIA AGENTS                          |
| NARCOLEPSY AND SLEEP DISORDER THERAPY AGENTS          | SKELETAL MUSCLE RELAXANTS                          |
| NASAL ANTI-INFLAMMATORY STEROIDS                      | SMOKING DETERRENT AGENTS (GANGLIONIC STIM,OTHERS)  |
| NASAL ANTIHISTAMINE                                   | SMOKING DETERRENT-NICOTINIC RECEPT.PARTIAL AGONIST |
| NASAL ANTIHISTAMINE AND ANTI-INFLAM. STEROID COMB.    | SODIUM/SALINE PREPARATIONS                         |
| NASAL MAST CELL STABILIZERS                           | SOLVENTS                                           |
| NASAL MOISTURIZER                                     | SOMATOSTATIC AGENTS                                |
| NASAL WASHES                                          | SSRI AND 5HT1A PARTIAL AGONIST ANTIDEPRESSANTS     |
| NEEDLES/NEEDLELESS DEVICES                            | SSRI, SEROTONIN RECEPTOR MODULATOR ANTIDEPRESSANTS |
| NEUROMUSCULAR BLOCKING AGENTS                         | SSRI-ANTIPSYCH. ATYPICAL,DOPAMINE,SEROTONIN ANTAG  |
| NIACIN PREPARATIONS                                   | STEROID ANTINEOPLASTICS                            |
| NITROFURAN DERIVATIVES ANTIBACTERIAL AGENTS           | SUPPORT HOSIERY                                    |
| NON-OPIOID ANTITUS-1ST GEN ANTIHIST-ANALGESIC COMB    | SYRINGES AND ACCESSORIES                           |
| NON-OPIOID ANTITUS-1ST GEN.ANTIHISTAMINE-DECONGEST    | TETRACYCLINE ANTIBIOTICS                           |
| NON-OPIOID ANTITUS-1STGEN ANTIHIST-DECON-ANALGESIC    | THERMOMETERS                                       |
| NON-OPIOID ANTITUSS-DECONGESTANT-ANALGESIC-EXPECT     | THIAZIDE AND RELATED DIURETICS                     |
| NON-OPIOID ANTITUSSIVE AND EXPECTORANT COMBINATION    | THICKENING AGENTS, ORAL                            |
| NON-OPIOID ANTITUSSIVE-1ST GEN ANTIHISTAMINE COMB.    | THROMBIN INHIBITORS, SELECTIVE, DIRECT, REVERSIBLE |
| NON-OPIOID ANTITUSSIVE-DECONGESTANT-ANALGESIC COMB    | THROMBOPOIETIN RECEPTOR AGONISTS                   |
| NOREPINEPHRINE AND DOPAMINE REUPTAKE INHIB (NDRIS)    | THYROID FUNCTION DIAGNOSTIC AGENTS                 |
| NOSE PREPARATIONS ANTIBIOTICS                         | THYROID HORMONES                                   |
| NOSE PREPARATIONS, MISCELLANEOUS (OTC)                | TOOTH ACHE PREPARATIONS                            |
| NOSE PREPARATIONS, MISCELLANEOUS (RX)                 | TOP. ANTI-INFLAM.,PHOSPHODIESTERASE-4 (PDE4) INHIB |
| NOSE PREPARATIONS, VASOCONSTRICTORS(OTC)              | TOPICAL AGENTS,MISCELLANEOUS                       |
| NSAID AND HISTAMINE H2 RECEPTOR ANTAGONIST COMB.      | TOPICAL ANTI-INFLAMMATORY STEROID-LOCAL ANESTHETIC |
| NSAID,COX INHIBITOR-TYPE AND PROTON-PUMP INHIBITOR    | TOPICAL ANTI-INFLAMMATORY STEROIDAL                |
| NSAIDS(COX NON-SPEC.INHIB)AND PROSTAGLANDIN ANALOG    | TOPICAL ANTI-INFLAMMATORY, NSAIDS                  |
| NSAIDS, CYCLOOXYGENASE INHIBITOR - TYPE ANALGESICS    | TOPICAL ANTIBIOTICS                                |
| NSAIDS,CYCLOOXYGENASE-2(COX-2) SELECTIVE INHIBITOR    | TOPICAL ANTICHOLINERGIC HYPERHIDROSIS TX AGENTS    |
| NUTRITIONAL THERAPY, MED COND SPECIAL FORMULATION     | TOPICAL ANTIFUNGAL/ANTI-INFLAMMATORY,STEROID AGENT |
| OINTMENT/CREAM BASES                                  | TOPICAL ANTIFUNGALS                                |
| OPHTH VASC. ENDOTHELIAL GROWTH FACTOR ANTAGONISTS     | TOPICAL ANTINEOPLASTIC PREMALIGNANT LESION AGENTS  |
| OPHTHALMIC ANTI-INFLAMMATORY IMMUNOMODULATOR-TYPE     | TOPICAL ANTIPARASITICS                             |
| OPHTHALMIC ANTIBIOTICS                                | TOPICAL ANTIVIRALS                                 |
| OPHTHALMIC CYSTINE DEPLETING AGENTS                   | TOPICAL HYPERTRICHOTIC AGENTS, EYELASHES           |
| OPHTHALMIC PREPARATIONS, MISCELLANEOUS                | TOPICAL IMMUNOSUPPRESSIVE AGENTS                   |
| OPIOID ANALGESIC AND NON-SALICYLATE ANALGESICS        | TOPICAL LOCAL ANESTHETICS                          |
| OPIOID ANALGESIC AND NSAID COMBINATION                | TOPICAL PREPARATIONS,ANTIBACTERIALS                |
| OPIOID ANALGESIC AND SALICYLATE ANALGESIC COMB        | TOPICAL PREPARATIONS,MISCELLANEOUS                 |
| OPIOID ANALGESIC, ANESTHETIC ADJUNCT AGENTS           | TOPICAL SULFONAMIDES                               |
| OPIOID ANALGESICS                                     | TOPICAL/MUCOUS MEMBR./SUBCUT. ENZYMES              |
| OPIOID AND SALICYLATE ANALGESICS,BARBIT,XANTHINE      | TOPICALS, HYPERTRICHOTIC AGENTS                    |
| OPIOID ANTAGONISTS                                    | TRICYCLIC ANTIDEPRESSANTS,REL.NON-SEL.REUPT-INHIB  |
| OPIOID ANTITUSSIVE-1ST GENERATION ANTIHISTAMINE       | TX FOR ADHD - SELECTIVE ALPHA-2 RECEPTOR AGONIST   |
| OPIOID ANTITUSSIVE-ANTICHOLINERGIC COMBINATIONS       | TX FOR ATTENTION DEFICIT-HYPERACT(ADHD)/NARCOLEPSY |
| OPIOID ANTITUSSIVE-EXPECTORANT COMBINATION            | TX FOR ATTENTION DEFICIT-HYPERACT.(ADHD), NRI-TYPE |
| OPIOID WITHDRAWAL THERAPY AGENTS, OPIOID-TYPE         | URICOSURIC AGENTS                                  |
| OPIOID,NON-SALICYL.ANALGESIC,BARBITURATE,XANTHINE     | URINARY PH MODIFIERS                               |
| ORAL LIPID SUPPLEMENTS                                | URINARY TRACT ANALGESIC AGENTS                     |
| ORAL MUCOSITIS/STOMATITIS AGENTS                      | URINARY TRACT ANESTHETIC/ANALGESIC AGENT (AZO-DYE) |
| OSMOTIC DIURETICS                                     | URINARY TRACT ANTISPASMODIC, M(3) SELECTIVE ANTAG. |
| OSTOMY SUPPLIES                                       | URINARY TRACT ANTISPASMODIC/ANTIINCONTINENCE AGENT |
| OTIC PREPARATIONS,ANTI-INFLAMMATORY-ANTIBIOTICS       | URINE ACETONE TEST AIDS                            |
| OVERACTIVE BLADDER AGENTS, BETA-3 ADRENERGIC RECEPTOR | URINE GLUCOSE/ACETONE TEST AIDS,STRIPS             |
| OVULATION TESTS                                       | URINE TEST AIDS,MISCELLANEOUS                      |

Feature Table

|                                                       |                                                     |
|-------------------------------------------------------|-----------------------------------------------------|
| OXAZOLIDINONE ANTIBIOTICS                             | VACCINE/TOXOID PREPARATIONS,COMBINATIONS            |
| OXIDIZING AGENTS                                      | VAGINAL ANTIBIOTICS                                 |
| OXYTOXICS                                             | VAGINAL ANTIFUNGALS                                 |
| PANCREATIC ENZYMES                                    | VAGINAL ANTISEPTICS                                 |
| PARASYMPATHETIC AGENTS                                | VAGINAL ESTROGEN FOR SEXUAL DYSFUNCTION             |
| PEDIATRIC VITAMIN PREPARATIONS                        | VAGINAL ESTROGEN PREPARATIONS                       |
| PENICILLIN ANTIBIOTICS                                | VAGINAL LUBRICANTS PREPARATIONS                     |
| PERIODONTAL COLLAGENASE INHIBITORS                    | VAGINAL PREPARATIONS                                |
| PHARMACEUTICAL ADJUVANTS, TABLET, CAPSULE COMPONENTS  | VANCOMYCIN ANTIBIOTICS AND DERIVATIVES              |
| PHOSPHATE REPLACEMENT                                 | VASODILATORS, CORONARY                              |
| PHOSPHODIESTERASE-4 (PDE4) INHIBITORS                 | VEHICLES                                            |
| PINEAL HORMONE AGENTS                                 | VIRAL/TUMORIGENIC VACCINES                          |
| PITUITARY SUPPRESSIVE AGENTS                          | VITAMIN A AND D PREPARATIONS                        |
| PLATELET AGGREGATION INHIBITORS                       | VITAMIN A DERIVATIVES                               |
| PLATELET REDUCING AGENTS                              | VITAMIN A PREPARATIONS                              |
| POSTHERPETIC NEURALGIA AGENTS                         | VITAMIN B PREPARATIONS                              |
| POTASSIUM REPLACEMENT                                 | VITAMIN B1 PREPARATIONS                             |
| POTASSIUM SPARING DIURETICS                           | VITAMIN B12 PREPARATIONS                            |
| POTASSIUM SPARING DIURETICS IN COMBINATION            | VITAMIN B2 PREPARATIONS                             |
| PREGNANCY FACILITATING/MAINTAINING AGENT, HORMONAL    | VITAMIN B6 PREPARATIONS                             |
| PREGNANCY MAINTAINING AGENT, HORMONAL                 | VITAMIN C PREPARATIONS                              |
| PRENATAL VITAMIN PREPARATIONS                         | VITAMIN D PREPARATIONS                              |
| PRENATAL VITAMINS WITH LOW OR NO IRON                 | VITAMIN E PREPARATIONS                              |
| PROGESTATIONAL AGENTS                                 | VITAMIN K PREPARATIONS                              |
| PROTECTIVES                                           | WATER                                               |
| PROTEIN REPLACEMENT                                   | WOUND HEALING AGENTS, LOCAL                         |
| PROTEIN STABILIZERS                                   | XANTHINES                                           |
| PROTON-PUMP INHIBITORS                                | ZINC REPLACEMENT                                    |
| PSEUDOBULBAR AFFECT (PBA) AGENTS, NMDA ANTAGONISTS    | Elixhauser arth                                     |
| PULM ANTI-HTN, SOLUBLE GUANYLATE CYCLASE STIMULATOR   | Elixhauser psych                                    |
| PULM. ANTI-HTN, SEL. C-GMP PHOSPHODIESTERASE T5 INHIB | Elixhauser alcohol                                  |
| PULMONARY ANTI-HTN, ENDOTHELIN RECEPTOR ANTAGONIST    | Elixhauser chrnlung                                 |
| PULMONARY ANTIHYPERTENSIVES, PROSTACYCLIN-TYPE        | Elixhauser hypothy                                  |
| PULMONARY FIBROSIS - SYSTEMIC ENZYME INHIBITORS       | Elixhauser lytes                                    |
| QUINOLONE ANTIBIOTICS                                 | Elixhauser neuro                                    |
| RECTAL PREPARATIONS                                   | Elixhauser obese                                    |
| RECTAL/LOWER BOWEL PREP, GLUCOCORT. (NON-HEMORR)      | Elixhauser anemdef                                  |
| RENIN INHIBITOR, DIRECT                               | Elixhauser renlfail                                 |
| RESPIRATORY AIDS, DEVICES, EQUIPMENT                  | Elixhauser chf                                      |
| RIFAMYCINS AND RELATED DERIVATIVE ANTIBIOTICS         | Elixhauser htncx                                    |
| ROSACEA AGENTS, TOPICAL                               | Elixhauser dmcx                                     |
| RUBBER SYRINGES                                       | Elixhauser htn                                      |
| SALIVA STIMULANT AGENTS                               | Elixhauser drug                                     |
| SALIVA SUBSTITUTE AGENTS                              | Elixhauser dm                                       |
| SEDATIVE-HYPNOTICS - BENZODIAZEPINES                  | Elixhauser wghtloss                                 |
| SEDATIVE-HYPNOTICS, NON-BARBITURATE                   | Elixhauser valve                                    |
| SELECTIVE ESTROGEN RECEPTOR MODULATORS (SERMS)        | Elixhauser pervasc                                  |
| SELECTIVE SEROTONIN REUPTAKE INHIBITOR (SSRI)         | Elixhauser tumor                                    |
| SEROTONIN (5HT-4) PARTIAL AGONIST AGENTS              | Elixhauser liver                                    |
| SEROTONIN-2 ANTAG. REUPTAKE INH/DIETARY SUPP. COMB.   | Elixhauser mets                                     |
| SEROTONIN-2 ANTAGONIST/REUPTAKE INHIBITORS (SARIS)    | Elixhauser bldloss                                  |
| SEROTONIN-NOREPINEPHRINE REUPTAKE-INHIB (SNRIS)       | Elixhauser coag                                     |
| SEXUAL DYSFUNCTION DEVICES                            | Elixhauser ulcer                                    |
| SICKLE CELL ANEMIA AGENTS                             | Elixhauser para                                     |
| SKELETAL MUSCLE RELAXANTS                             | Elixhauser aids                                     |
| SMOKING DETERRENT AGENTS (GANGLIONIC STIM. OTHERS)    | Elixhauser pulmcirc                                 |
| SMOKING DETERRENT-NICOTINIC RECEPT. PARTIAL AGONIST   | Elixhauser lymph                                    |
| SODIUM/SALINE PREPARATIONS                            | mrtl scr                                            |
| SOLVENTS                                              | visit occurrence id                                 |
| SOMATOSTATIC AGENTS                                   | person id                                           |
| SSRI AND 5HT1A PARTIAL AGONIST ANTIDEPRESSANTS        | curb65                                              |
| SSRI, SEROTONIN RECEPTOR MODULATOR ANTIDEPRESSANTS    | qSOFA                                               |
| SSRI-ANTIPSYCH. ATYPICAL, DOPAMINE, SEROTONIN ANTAG   | ox status240 ROOM AIR                               |
| STEROID ANTINEOPLASTICS                               | FirstRace Other                                     |
| SUPPORT HOSIERY                                       | FirstRace Other Pacific Islander                    |
| SYRINGES AND ACCESSORIES                              | FirstRace Other/Not Listed                          |
| TETRACYCLINE ANTIBIOTICS                              | FirstRace Patient Refused                           |
| THERMOMETERS                                          | FirstRace Unknown                                   |
| THIAZIDE AND RELATED DIURETICS                        | FirstRace White or Caucasian                        |
| THICKENING AGENTS, ORAL                               | Ethnicity Hispanic or Latino                        |
| THROMBIN INHIBITORS, SELECTIVE, DIRECT, REVERSIBLE    | Ethnicity Non-Hispanic                              |
| THROMBOPOIETIN RECEPTOR AGONISTS                      | Ethnicity Patient Refused                           |
| THYROID FUNCTION DIAGNOSTIC AGENTS                    | Ethnicity Unknown                                   |
| THYROID HORMONES                                      | PreferredLanguage NotEnglish                        |
| TOOTH ACHE PREPARATIONS                               | PreferredLanguage Unknown                           |
| TOP. ANTI-INFLAM. PHOSPHODIESTERASE-4 (PDE4) INHIB    | SmokingStatus Current Some Day Smoker               |
| TOPICAL AGENTS, MISCELLANEOUS                         | SmokingStatus Former Smoker                         |
| TOPICAL ANTI-INFLAMMATORY STEROID-LOCAL ANESTHETIC    | SmokingStatus Heavy Tobacco Smoker                  |
| TOPICAL ANTI-INFLAMMATORY STEROIDAL                   | SmokingStatus Light Tobacco Smoker                  |
| TOPICAL ANTI-INFLAMMATORY, NSAIDS                     | SmokingStatus Never Smoker                          |
| TOPICAL ANTIBIOTICS                                   | SmokingStatus Passive Smoke Exposure - Never Smoker |
| TOPICAL ANTICHOLINERGIC HYPERHIDROSIS TX AGENTS       | SmokingStatus Unknown                               |
| TOPICAL ANTIFUNGAL/ANTI-INFLAMMATORY, STEROID AGENT   | AcuityLevel Emergent                                |
| TOPICAL ANTIFUNGALS                                   | AcuityLevel Immediate                               |
| TOPICAL ANTINEOPLASTIC PREMALIGNANT LESION AGENTS     | AcuityLevel Less Urgent                             |

Feature Table

|                                                       |                                     |
|-------------------------------------------------------|-------------------------------------|
| TOPICAL ANTIPARASITICS                                | AcuityLevel Urgent                  |
| TOPICAL ANTIVIRALS                                    | FinancialClass Medicaid             |
| TOPICAL HYPERTRICHOTIC AGENTS, EYELASHES              | FinancialClass Medicare             |
| TOPICAL IMMUNOSUPPRESSIVE AGENTS                      | FinancialClass Other                |
| TOPICAL LOCAL ANESTHETICS                             | FinancialClass Self-pay             |
| TOPICAL PREPARATIONS,ANTIBACTERIALS                   | chief complaint ABDOMINAL PAIN      |
| TOPICAL PREPARATIONS,MISCELLANEOUS                    | chief complaint BACK PAIN           |
| TOPICAL SULFONAMIDES                                  | chief complaint CHEST PAIN          |
| TOPICAL/MUCOUS MEMBR./SUBCUT. ENZYMES                 | chief complaint COUGH               |
| TOPICALS, HYPERTRICHOTIC AGENTS                       | chief complaint EMESIS              |
| NOSE PREPARATIONS, VASOCONSTRICTORS(OTC)              | chief complaint FEVER               |
| NSAID AND HISTAMINE H2 RECEPTOR ANTAGONIST COMB.      | chief complaint NAUSEA              |
| NSAID,COX INHIBITOR-TYPE AND PROTON-PUMP INHIBITOR    | chief complaint Other               |
| NSAIDS(COX NON-SPEC.INHIB)AND PROSTAGLANDIN ANALOG    | chief complaint SHORTNESS OF BREATH |
| NSAIDS, CYCLOOXYGENASE INHIBITOR - TYPE ANALGESICS    | Sex Male                            |
| NSAIDS,CYCLOOXYGENASE-2(COX-2) SELECTIVE INHIBITOR    | Chest X-ray No Opacity              |
| NUTRITIONAL THERAPY, MED COND SPECIAL FORMULATION     | Chest X-ray Unilateral Opacity      |
| OINTMENT/CREAM BASES                                  | Chest X-ray Bilateral Opacity       |
| OPHTH VASC. ENDOTHELIAL GROWTH FACTOR ANTAGONISTS     |                                     |
| OPHTHALMIC ANTI-INFLAMMATORY IMMUNOMODULATOR-TYPE     |                                     |
| OPHTHALMIC ANTIBIOTICS                                |                                     |
| OPHTHALMIC CYSTINE DEPLETING AGENTS                   |                                     |
| OPHTHALMIC PREPARATIONS, MISCELLANEOUS                |                                     |
| OPIOID ANALGESIC AND NON-SALICYLATE ANALGESICS        |                                     |
| OPIOID ANALGESIC AND NSAID COMBINATION                |                                     |
| OPIOID ANALGESIC AND SALICYLATE ANALGESIC COMB        |                                     |
| OPIOID ANALGESIC, ANESTHETIC ADJUNCT AGENTS           |                                     |
| OPIOID ANALGESICS                                     |                                     |
| OPIOID AND SALICYLATE ANALGESICS,BARBIT,XANTHINE      |                                     |
| OPIOID ANTAGONISTS                                    |                                     |
| OPIOID ANTITUSSIVE-1ST GENERATION ANTIHISTAMINE       |                                     |
| OPIOID ANTITUSSIVE-ANTICHOLINERGIC COMBINATIONS       |                                     |
| OPIOID ANTITUSSIVE-EXPECTORANT COMBINATION            |                                     |
| OPIOID WITHDRAWAL THERAPY AGENTS, OPIOID-TYPE         |                                     |
| OPIOID,NON-SALICYL ANALGESIC,BARBITURATE,XANTHINE     |                                     |
| ORAL LIPID SUPPLEMENTS                                |                                     |
| ORAL MUCOSITIS/STOMATITIS AGENTS                      |                                     |
| OSMOTIC DIURETICS                                     |                                     |
| OSTOMY SUPPLIES                                       |                                     |
| OTIC PREPARATIONS,ANTI-INFLAMMATORY-ANTIBIOTICS       |                                     |
| OVERACTIVE BLADDER AGENTS, BETA-3 ADRENERGIC RECEPTOR |                                     |
| OVULATION TESTS                                       |                                     |
| OXAZOLIDINONE ANTIBIOTICS                             |                                     |
| OXIDIZING AGENTS                                      |                                     |
| OXYTOCICS                                             |                                     |

**Table S4:** Patient characteristics for development cohort

|                          |                              | Grouped by acute decompensation outcome |                      |                      |                      |
|--------------------------|------------------------------|-----------------------------------------|----------------------|----------------------|----------------------|
|                          |                              | Missing                                 | Overall              | 0                    | 1                    |
| n                        |                              |                                         | 932                  | 821                  | 111                  |
| age, median [Q1,Q3]      |                              | 0                                       | 67.0 [55.8,80.0]     | 68.0 [56.0,81.0]     | 64.0 [52.0,77.5]     |
| age_cat, n (%)           | age_18_44                    | 0                                       | 109 (11.7)           | 94 (11.4)            | 15 (13.5)            |
|                          | age_45-64                    |                                         | 322 (34.5)           | 273 (33.3)           | 49 (44.1)            |
|                          | age_great65                  |                                         | 501 (53.8)           | 454 (55.3)           | 47 (42.3)            |
| Sex, n (%)               | Female                       | 0                                       | 435 (46.7)           | 387 (47.1)           | 48 (43.2)            |
|                          | Male                         |                                         | 497 (53.3)           | 434 (52.9)           | 63 (56.8)            |
| FirstRace, n (%)         | Black or African American    | 0                                       | 215 (23.1)           | 186 (22.7)           | 29 (26.1)            |
|                          | Other                        |                                         | 265 (28.4)           | 228 (27.8)           | 37 (33.3)            |
|                          | White or Caucasian           |                                         | 452 (48.5)           | 407 (49.6)           | 45 (40.5)            |
| Ethnicity, n (%)         | Hispanic or Latino           | 0                                       | 245 (26.3)           | 210 (25.6)           | 35 (31.5)            |
|                          | Non-Hispanic                 |                                         | 668 (71.7)           | 595 (72.5)           | 73 (65.8)            |
|                          | Unknown                      |                                         | 19 (2.0)             | 16 (1.9)             | 3 (2.7)              |
| PreferredLanguage, n (%) | English                      | 0                                       | 728 (78.1)           | 644 (78.4)           | 84 (75.7)            |
|                          | NotEnglish                   |                                         | 201 (21.6)           | 174 (21.2)           | 27 (24.3)            |
|                          | Unknown                      |                                         | 3 (0.3)              | 3 (0.4)              |                      |
| SmokingStatus, n (%)     | Former Smoker                | 0                                       | 289 (31.0)           | 258 (31.4)           | 31 (27.9)            |
|                          | Never Smoker                 |                                         | 457 (49.0)           | 402 (49.0)           | 55 (49.5)            |
|                          | Smoker                       |                                         | 28 (3.0)             | 24 (2.9)             | 4 (3.6)              |
|                          | Unknown                      |                                         | 158 (17.0)           | 137 (16.7)           | 21 (18.9)            |
| FinancialClass, n (%)    | Commercial                   | 0                                       | 117 (12.6)           | 101 (12.3)           | 16 (14.4)            |
|                          | Medicaid                     |                                         | 118 (12.7)           | 102 (12.4)           | 16 (14.4)            |
|                          | Medicare                     |                                         | 500 (53.6)           | 450 (54.8)           | 50 (45.0)            |
|                          | Other                        |                                         | 98 (10.5)            | 82 (10.0)            | 16 (14.4)            |
|                          | Self-pay                     |                                         | 99 (10.6)            | 86 (10.5)            | 13 (11.7)            |
| Comorbidities            | cc_hypothy, n (%)            |                                         | 140 (15.0)           | 123 (15.0)           | 17 (15.3)            |
|                          | cc_mets, n (%)               |                                         | 62 (6.7)             | 53 (6.5)             | 9 (8.1)              |
|                          | cc_neuro, n (%)              |                                         | 252 (27.0)           | 226 (27.5)           | 26 (23.4)            |
|                          | cc_renfail, n (%)            |                                         | 166 (17.8)           | 145 (17.7)           | 21 (18.9)            |
|                          | cc_chf, n (%)                |                                         | 154 (16.5)           | 139 (16.9)           | 15 (13.5)            |
|                          | cc_depress, n (%)            |                                         | 199 (21.4)           | 179 (21.8)           | 20 (18.0)            |
|                          | cc_chrlung, n (%)            |                                         | 225 (24.1)           | 200 (24.4)           | 25 (22.5)            |
|                          | cc_htn, n (%)                |                                         | 206 (22.1)           | 181 (22.0)           | 25 (22.5)            |
|                          | cc_valve, n (%)              |                                         | 172 (18.5)           | 157 (19.1)           | 15 (13.5)            |
|                          | cc_bldloss, n (%)            |                                         | 53 (5.7)             | 47 (5.7)             | 6 (5.4)              |
|                          | cc_perivasc, n (%)           |                                         | 177 (19.0)           | 152 (18.5)           | 25 (22.5)            |
|                          | cc_lytes, n (%)              |                                         | 302 (32.4)           | 268 (32.6)           | 34 (30.6)            |
|                          | cc_psych, n (%)              |                                         | 102 (10.9)           | 91 (11.1)            | 11 (9.9)             |
|                          | cc_arth, n (%)               |                                         | 67 (7.2)             | 57 (6.9)             | 10 (9.0)             |
|                          | cc_dm, n (%)                 |                                         | 217 (23.3)           | 189 (23.0)           | 28 (25.2)            |
|                          | cc_wghtloss, n (%)           |                                         | 134 (14.4)           | 119 (14.5)           | 15 (13.5)            |
|                          | cc_anemdef, n (%)            |                                         | 260 (27.9)           | 224 (27.3)           | 36 (32.4)            |
|                          | cc_obese, n (%)              |                                         | 220 (23.6)           | 192 (23.4)           | 28 (25.2)            |
|                          | cc_dm, n (%)                 |                                         | 90 (9.7)             | 75 (9.1)             | 15 (13.5)            |
|                          | cc_alcohol, n (%)            |                                         | 44 (4.7)             | 41 (5.0)             | 3 (2.7)              |
|                          | cc_drug, n (%)               |                                         | 33 (3.5)             | 27 (3.3)             | 6 (5.4)              |
|                          | cc_liver, n (%)              |                                         | 86 (9.2)             | 74 (9.0)             | 12 (10.8)            |
|                          | cc_coag, n (%)               |                                         | 81 (8.7)             | 76 (9.3)             | 5 (4.5)              |
|                          | cc_htn, n (%)                |                                         | 282 (30.3)           | 247 (30.1)           | 35 (31.5)            |
|                          | cc_tumor, n (%)              |                                         | 80 (8.6)             | 74 (9.0)             | 6 (5.4)              |
|                          | cc_para, n (%)               |                                         | 59 (6.3)             | 52 (6.3)             | 7 (6.3)              |
|                          | cc_ulcer, n (%)              |                                         | 43 (4.6)             | 40 (4.9)             | 3 (2.7)              |
|                          | cc_pulmcirc, n (%)           |                                         | 49 (5.3)             | 44 (5.4)             | 5 (4.5)              |
|                          | cc_lymph, n (%)              |                                         | 10 (1.1)             | 10 (1.2)             |                      |
|                          | cc_aids, n (%)               |                                         | 13 (1.4)             | 11 (1.3)             | 2 (1.8)              |
| Model Variables          | last_o2_flow, median [Q1,Q3] | 8                                       | 2.0 [1.0,3.0]        | 2.0 [0.0,2.5]        | 3.0 [2.0,4.9]        |
|                          | last_RR, median [Q1,Q3]      | 11                                      | 20.0 [18.0,22.0]     | 20.0 [18.0,21.0]     | 20.0 [18.5,24.0]     |
|                          | min_SPO2, median [Q1,Q3]     | 11                                      | 93.0 [91.0,95.0]     | 93.0 [91.0,95.0]     | 91.0 [88.0,93.0]     |
|                          | ast, median [Q1,Q3]          | 236                                     | 44.0 [31.0,63.0]     | 42.0 [30.0,58.2]     | 59.0 [43.0,82.0]     |
|                          | chloride, median [Q1,Q3]     | 34                                      | 100.0 [97.0,103.0]   | 100.0 [97.0,103.0]   | 98.0 [96.0,102.0]    |
|                          | PROCAL, median [Q1,Q3]       | 457                                     | 0.1 [0.1,0.3]        | 0.1 [0.1,0.2]        | 0.2 [0.1,0.5]        |
|                          | min_SBP, median [Q1,Q3]      | 11                                      | 117.0 [105.0,128.0]  | 117.0 [105.0,128.8]  | 113.0 [102.5,126.5]  |
|                          | WBC, median [Q1,Q3]          | 32                                      | 6.3 [4.9,8.4]        | 6.2 [4.9,8.3]        | 7.0 [5.1,9.2]        |
|                          | bun, median [Q1,Q3]          | 28                                      | 17.0 [11.0,27.0]     | 16.0 [11.0,26.0]     | 20.5 [13.0,32.8]     |
|                          | creatinine, median [Q1,Q3]   | 28                                      | 1.0 [0.8,1.4]        | 1.0 [0.8,1.4]        | 1.0 [0.8,1.8]        |
|                          | glucose, median [Q1,Q3]      | 27                                      | 119.0 [104.0,150.0]  | 118.0 [104.0,148.5]  | 126.0 [109.0,167.5]  |
|                          | CRP, median [Q1,Q3]          | 631                                     | 85.7 [37.7,144.9]    | 76.2 [34.5,135.3]    | 124.5 [87.8,222.4]   |
|                          | FERRITIN, median [Q1,Q3]     | 596                                     | 622.5 [309.8,1061.2] | 568.0 [305.0,1017.0] | 843.0 [461.0,1313.5] |



**Table S5: Patient characteristics for validation cohort**

|                          |                              | Grouped by acute decompensation outcome |                     |                     |                       |
|--------------------------|------------------------------|-----------------------------------------|---------------------|---------------------|-----------------------|
|                          |                              | Missing                                 | Overall             | 0                   | 1                     |
| n                        |                              |                                         | 240                 | 207                 | 33                    |
| age, median [Q1,Q3]      |                              | 0                                       | 71.0 [58.0,84.0]    | 71.0 [59.0,84.0]    | 67.0 [56.0,79.0]      |
| age_cat, n (%)           | age_18-44                    | 0                                       | 15 (6.2)            | 11 (5.3)            | 4 (12.1)              |
|                          | age_45-64                    |                                         | 78 (32.5)           | 67 (32.4)           | 11 (33.3)             |
|                          | age_great65                  |                                         | 147 (61.3)          | 129 (62.3)          | 18 (54.5)             |
| Sex, n (%)               | Female                       | 0                                       | 132 (55.0)          | 119 (57.5)          | 13 (39.4)             |
|                          | Male                         |                                         | 108 (45.0)          | 88 (42.5)           | 20 (60.6)             |
| FirstRace, n (%)         | Black or African American    | 0                                       | 85 (35.4)           | 74 (35.7)           | 11 (33.3)             |
|                          | Other                        |                                         | 27 (11.2)           | 23 (11.1)           | 4 (12.1)              |
|                          | White or Caucasian           |                                         | 128 (53.3)          | 110 (53.1)          | 18 (54.5)             |
| Ethnicity, n (%)         | Hispanic or Latino           | 0                                       | 32 (13.3)           | 23 (11.1)           | 9 (27.3)              |
|                          | Non-Hispanic                 |                                         | 205 (85.4)          | 181 (87.4)          | 24 (72.7)             |
|                          | Unknown                      |                                         | 3 (1.2)             | 3 (1.4)             | —                     |
| PreferredLanguage, n (%) | English                      | 0                                       | 220 (91.7)          | 192 (92.8)          | 28 (84.8)             |
|                          | NotEnglish                   |                                         | 20 (8.3)            | 15 (7.2)            | 5 (15.2)              |
| SmokingStatus, n (%)     | Former Smoker                | 0                                       | 96 (40.0)           | 82 (39.6)           | 14 (42.4)             |
|                          | Never Smoker                 |                                         | 112 (46.7)          | 101 (48.8)          | 11 (33.3)             |
|                          | Smoker                       |                                         | 19 (7.9)            | 15 (7.2)            | 4 (12.1)              |
|                          | Unknown                      |                                         | 13 (5.4)            | 9 (4.3)             | 4 (12.1)              |
| FinancialClass, n (%)    | Commercial                   | 0                                       | 22 (9.2)            | 17 (8.2)            | 5 (15.2)              |
|                          | Medicaid                     |                                         | 41 (17.1)           | 34 (16.4)           | 7 (21.2)              |
|                          | Medicare                     |                                         | 158 (65.8)          | 140 (67.6)          | 18 (54.5)             |
|                          | Other                        |                                         | 13 (5.4)            | 10 (4.8)            | 3 (9.1)               |
|                          | Self-pay                     |                                         | 6 (2.5)             | 6 (2.9)             | —                     |
| Comorbidities            | cc_hypothy, n (%)            |                                         | 68 (28.3)           | 63 (30.4)           | 5 (15.2)              |
|                          | cc_mets, n (%)               |                                         | 13 (5.4)            | 13 (6.3)            | —                     |
|                          | cc_neuro, n (%)              |                                         | 104 (43.3)          | 94 (45.4)           | 10 (30.3)             |
|                          | cc_renlfail, n (%)           |                                         | 69 (28.7)           | 60 (29.0)           | 9 (27.3)              |
|                          | cc_chf, n (%)                |                                         | 69 (28.7)           | 64 (30.9)           | 5 (15.2)              |
|                          | cc_depress, n (%)            |                                         | 92 (38.3)           | 81 (39.1)           | 11 (33.3)             |
|                          | cc_chrnlung, n (%)           |                                         | 89 (37.1)           | 82 (39.6)           | 7 (21.2)              |
|                          | cc_htn, n (%)                |                                         | 94 (39.2)           | 83 (40.1)           | 11 (33.3)             |
|                          | cc_valve, n (%)              |                                         | 84 (35.0)           | 78 (37.7)           | 6 (18.2)              |
|                          | cc_bldloss, n (%)            |                                         | 22 (9.2)            | 21 (10.1)           | 1 (3.0)               |
|                          | cc_perivasc, n (%)           |                                         | 74 (30.8)           | 68 (32.9)           | 6 (18.2)              |
|                          | cc_lytes, n (%)              |                                         | 123 (51.2)          | 110 (53.1)          | 13 (39.4)             |
|                          | cc_psych, n (%)              |                                         | 40 (16.7)           | 35 (16.9)           | 5 (15.2)              |
|                          | cc_arth, n (%)               |                                         | 18 (7.5)            | 17 (8.2)            | 1 (3.0)               |
|                          | cc_dm, n (%)                 |                                         | 83 (34.6)           | 74 (35.7)           | 9 (27.3)              |
|                          | cc_wghtloss, n (%)           |                                         | 42 (17.5)           | 39 (18.8)           | 3 (9.1)               |
|                          | cc_anemdef, n (%)            |                                         | 103 (42.9)          | 91 (44.0)           | 12 (36.4)             |
|                          | cc_obese, n (%)              |                                         | 81 (33.8)           | 69 (33.3)           | 12 (36.4)             |
|                          | cc_dm, n (%)                 |                                         | 22 (9.2)            | 18 (8.7)            | 4 (12.1)              |
|                          | cc_alcohol, n (%)            |                                         | 26 (10.8)           | 22 (10.6)           | 4 (12.1)              |
|                          | cc_drug, n (%)               |                                         | 30 (12.5)           | 24 (11.6)           | 6 (18.2)              |
|                          | cc_liver, n (%)              |                                         | 26 (10.8)           | 23 (11.1)           | 3 (9.1)               |
|                          | cc_coag, n (%)               |                                         | 27 (11.2)           | 22 (10.6)           | 5 (15.2)              |
|                          | cc_htn, n (%)                |                                         | 76 (31.7)           | 64 (30.9)           | 12 (36.4)             |
|                          | cc_tumor, n (%)              |                                         | 26 (10.8)           | 22 (10.6)           | 4 (12.1)              |
|                          | cc_para, n (%)               |                                         | 21 (8.8)            | 19 (9.2)            | 2 (6.1)               |
|                          | cc_ulcer, n (%)              |                                         | 15 (6.2)            | 12 (5.8)            | 3 (9.1)               |
|                          | cc_pulmcirc, n (%)           |                                         | 21 (8.8)            | 20 (9.7)            | 1 (3.0)               |
|                          | cc_lymph, n (%)              |                                         | 2 (0.8)             | 2 (1.0)             | —                     |
|                          | cc_aids, n (%)               |                                         | 5 (2.1)             | 5 (2.4)             | —                     |
| CSI Model Variables      | last_o2_flow, median [Q1,Q3] | 1                                       | 2.0 [1.0,3.0]       | 2.0 [0.0,2.0]       | 4.0 [3.0,5.0]         |
|                          | last_RR, median [Q1,Q3]      | 6                                       | 20.0 [18.0,22.0]    | 20.0 [18.0,20.0]    | 20.0 [18.0,22.0]      |
|                          | min_SPO2, median [Q1,Q3]     | 6                                       | 94.0 [91.0,95.0]    | 94.0 [92.0,95.0]    | 91.0 [87.0,93.5]      |
|                          | ast, median [Q1,Q3]          | 87                                      | 37.0 [26.0,55.0]    | 37.0 [25.0,52.0]    | 42.5 [30.0,70.0]      |
|                          | chloride, median [Q1,Q3]     | 11                                      | 99.0 [95.0,102.0]   | 99.0 [95.0,102.0]   | 98.0 [94.0,101.0]     |
|                          | PROCAL, median [Q1,Q3]       | 136                                     | 0.1 [0.1,0.3]       | 0.1 [0.1,0.3]       | 0.3 [0.1,0.8]         |
|                          | min_SBP, median [Q1,Q3]      | 6                                       | 113.0 [102.2,122.8] | 113.0 [103.0,123.0] | 112.0 [99.5,121.5]    |
|                          | WBC, median [Q1,Q3]          | 8                                       | 6.3 [5.0,8.5]       | 6.3 [5.0,8.2]       | 6.1 [5.1,8.9]         |
|                          | bun, median [Q1,Q3]          | 7                                       | 21.0 [13.0,32.0]    | 20.0 [13.2,30.8]    | 22.0 [12.5,47.0]      |
|                          | creatinine, median [Q1,Q3]   | 7                                       | 1.1 [0.8,1.7]       | 1.1 [0.8,1.6]       | 1.3 [0.8,2.0]         |
|                          | glucose, median [Q1,Q3]      | 7                                       | 126.0 [107.0,164.0] | 126.0 [107.0,164.0] | 122.0 [110.0,172.0]   |
|                          | CRP, median [Q1,Q3]          | 146                                     | 92.4 [49.7,142.3]   | 89.0 [47.9,138.5]   | 117.0 [93.8,202.3]    |
|                          | FERRITIN, median [Q1,Q3]     | 185                                     | 466.0 [275.5,913.0] | 416.5 [265.5,790.5] | 1107.0 [934.0,1222.0] |

**Table S6:** Physician-coded chest x-rays and outcome counts

| CXR class            | Outcome             |                  |
|----------------------|---------------------|------------------|
|                      | No critical illness | Critical illness |
| No opacities         | 251                 | 15               |
| Unilateral opacities | 146                 | 19               |
| Bilateral opacities  | 562                 | 104              |

**Table S7:** Performance Characteristics for CSI, qCSI, and comparison models on cross-validation. The best performance for a given metric is shown with bold text.

| Model      | AU-ROC                  | Accuracy                | Sensitivity             | Specificity             | AU-PRC                  | Brier score             | F1                      | Average Precision       |
|------------|-------------------------|-------------------------|-------------------------|-------------------------|-------------------------|-------------------------|-------------------------|-------------------------|
| CURB-65    | 0.66 (0.58,0.78)        | 0.79 (0.56,0.94)        | 0.67 (0.29,1.00)        | 0.62 (0.27,0.93)        | 0.26 (0.09,0.44)        | 0.10 (0.06,0.15)        | 0.20 (0.00,0.36)        | 0.20 (0.10,0.33)        |
| qSOFA      | 0.76 (0.69,0.86)        | <b>0.88 (0.82,0.95)</b> | 0.79 (0.62,1.00)        | 0.70 (0.60,0.80)        | 0.35 (0.09,0.62)        | 0.09 (0.05,0.14)        | 0.21 (0.00,0.46)        | 0.26 (0.13,0.42)        |
| Elixhauser | 0.70 (0.62,0.80)        | 0.71 (0.40,0.86)        | 0.73 (0.47,1.00)        | 0.67 (0.33, 0.88)       | 0.20 (0.09, 0.36)       | 0.10 (0.06, 0.15)       | 0.30 (0.15,0.43)        | 0.22 (0.11, 0.36)       |
| qCSI       | 0.90 (0.85,0.96)        | 0.84 (0.72,0.94)        | 0.90 (0.70,1.00)        | 0.79 (0.59,0.94)        | 0.54 (0.27,0.76)        | <b>0.07 (0.04,0.11)</b> | 0.49 (0.30,0.67)        | 0.52 (0.30,0.72)        |
| CSI        | <b>0.91 (0.86,0.97)</b> | 0.83 (0.70,0.94)        | <b>0.94 (0.77,1.00)</b> | <b>0.82 (0.67,0.95)</b> | <b>0.56 (0.25,0.80)</b> | 0.25 (0.25,0.28)        | <b>0.51 (0.29,0.70)</b> | <b>0.58 (0.31,0.81)</b> |

## References

1. Jones DR. A Taxonomy of Global Optimization Methods Based on Response Surfaces. *Journal of Global Optimization*. 2001;21(4):345–383.
2. Bergstra J, Yamins D, Cox DD. Making a Science of Model Search: Hyperparameter Optimization in Hundreds of Dimensions for Vision Architectures. In: *Proceedings of the 30th International Conference on Machine Learning - Volume 28. ICML'13. JMLR.org; 2013. p. I-115–I-123.*
